1           ***Drosophila* gustatory projections are segregated by taste modality and**  
2                                   **connectivity**

3  
4           Stefanie Engert<sup>1,2</sup>, Gabriella R. Sterne<sup>1</sup>, Davi D. Bock<sup>2,3</sup>, and Kristin Scott<sup>1,\*</sup>

5  
6           <sup>1</sup>University of California, Berkeley, United States

7           <sup>2</sup>Janelia Research Campus, Howard Hughes Medical Institute, United States

8           <sup>3</sup>current address: University of Vermont, Burlington, United States

9           \*Corresponding author

10  
11  
12           **Abstract**

13           Gustatory sensory neurons detect caloric and harmful compounds in potential  
14 food and convey this information to the brain to inform feeding decisions. To examine  
15 the signals that gustatory neurons transmit and receive, we reconstructed gustatory  
16 axons and their synaptic sites in the adult *Drosophila melanogaster* brain, utilizing a  
17 whole-brain electron microscopy volume. We reconstructed 87 gustatory projections  
18 from the proboscis labellum in the right hemisphere and 57 from the left, representing  
19 the majority of labellar gustatory axons. Gustatory neurons contain a nearly equal  
20 number of interspersed pre- and post-synaptic sites, with extensive synaptic connectivity  
21 among gustatory axons. Morphology- and connectivity-based clustering revealed six  
22 distinct groups, likely representing neurons recognizing different taste modalities. The  
23 vast majority of synaptic connections are between neurons of the same group. This  
24 study resolves the anatomy of labellar gustatory projections, reveals that gustatory  
25 projections are segregated based on taste modality, and uncovers synaptic connections  
26 that may alter the transmission of gustatory signals.

27  
28  
29

## 30 Introduction

31 All animals have specialized sensory neurons dedicated to the detection of the rich  
32 variety of chemicals in the environment that indicate the presence of food sources,  
33 predators and conspecifics. Gustatory sensory neurons have evolved to detect food-  
34 associated chemicals and report the presence of caloric or potentially harmful  
35 compounds. Examining the activation and modulation of gustatory sensory neurons is  
36 essential as it places fundamental limits on the taste information that is funneled to the  
37 brain and integrated to form feeding decisions.

38 The *Drosophila melanogaster* gustatory system is an attractive model to examine  
39 the synaptic transmission of gustatory neurons. Molecular genetic approaches coupled  
40 with physiology and behavior have established five different classes of gustatory receptor  
41 neurons (GRNs) in adult *Drosophila* that detect different taste modalities. One class,  
42 expressing members of the Gustatory Receptor (GR) family including Gr5a and Gr64f,  
43 detects sugars and elicits acceptance behavior (Dahanukar et al 2001, Dahanukar et al  
44 2007, Thorne et al 2004, Wang et al 2004). A second class expressing different GRs  
45 including Gr66a detects bitter compounds and mediates rejection behavior (Thorne et al  
46 2004, Wang et al 2004, Weiss et al 2011). A third class contains the ion channel Ppk28  
47 and detects water (Cameron et al 2010, Chen et al 2010). The fourth expresses the Ir94e  
48 ionotropic receptor and detects low salt concentrations, whereas the fifth contains the  
49 Ppk23 ion channel and may mediate detection of high salt concentrations (Jaeger et al  
50 2018, Thistle et al 2012). In addition to well-characterized gustatory neurons and a  
51 peripheral strategy for taste detection akin to mammals (Yarmolinsky et al 2009), the  
52 reduced number of neurons in the *Drosophila* nervous system and the availability of  
53 electron microscopy (EM) brain volumes offer the opportunity to examine gustatory  
54 transmission with high resolution.

55 The cell bodies of gustatory neurons are housed in sensilla on the body surface  
56 including the proboscis labellum, an external mouthparts organ that detects taste  
57 compounds prior to ingestion (Stocker 1994). Gustatory neurons from each labellum half  
58 send bilaterally symmetric axonal projections to the subesophageal zone (SEZ) of the fly  
59 brain via the labial nerves. Gustatory axons terminate in the medial SEZ in a region called  
60 the anterior central sensory center (ACSC) (Hartenstein et al 2018, Miyazaki & Ito 2010,



61 Thorne et al 2004, Wang et al 2004). Axons from bitter gustatory neurons send branches  
62 to the midline and form an interconnected medial ring whereas other gustatory axons  
63 remain ipsilateral and anterolateral to bitter projections. Although projections of different  
64 gustatory classes have been mapped using light level microscopy, the synaptic  
65 connectivity of gustatory axons in adult *Drosophila* is largely unexamined.

66 To explore the connectivity of GRNs and to lay the groundwork to study gustatory  
67 circuits with synaptic resolution, we used the recently available Full Adult Fly Brain  
68 (FAFB) Electron Microscopy (EM) dataset (Zheng et al 2018) to fully reconstruct  
69 gustatory axons and their synaptic sites. We reconstructed 87 GRN axonal projections  
70 in the right hemisphere and 57 in the left, representing between 83-96% and 54-63% of  
71 the total expected, respectively (Jaeger et al., 2018, Stocker, 1994). By annotating  
72 chemical synapses, we observed that GRNs contain a nearly equal number of  
73 interspersed pre-and post-synaptic sites. Interestingly, GRNs synapse onto and receive  
74 synaptic inputs from many other GRNs. Using morphology- and connectivity-based  
75 clustering, we identified six distinct neural groups, likely representing groups of GRNs  
76 that recognize different taste modalities. Our study reveals extensive anatomical  
77 connectivity between GRNs within a taste modality, arguing for pre-synaptic processing  
78 of taste information prior to transmission to downstream circuits.

79

## 80 **Results**

81

### 82 **GRN axons contain pre-synaptic and post-synaptic sites**

83 To systematically characterize gustatory inputs and outputs, we traced gustatory  
84 axons in the FAFB volume (Zheng et al 2018). Tracing was performed manually, using  
85 the annotation platform CATMAID (Saalfeld et al 2009). The GRNs from the proboscis  
86 labellum send axons through the labial nerve to the SEZ (Figure 1A). The labial nerve is  
87 a compound nerve, carrying sensory axons from the labellum, maxillary palp, and eye, as  
88 well as motor axons innervating proboscis musculature (Hempel et al 2020, Hartenstein  
89 et al 2018, Miyazaki & Ito 2010, Nayak & Singh 1983, Rajashekhar & Singh 1994).  
90 Different sensory afferents occupy different domains in the SEZ, with labellar gustatory  
91 axons terminating in the anterior central sensory center (ACSC) (Hartenstein et al 2018,  
92 Miyazaki & Ito 2010, Thorne et al 2004, Wang et al 2004). Therefore, to trace gustatory

93 axons, we began by tracing neurites in the right labial nerve, readily identifiable in the EM  
94 dataset (Figure 1B and C), and selected fibers that terminated in the anterior central SEZ  
95 to trace to synaptic completion (Zheng et al 2018).

96 In tracing axons, we found that neurites with small to medium sized diameters in  
97 the dorsomedial labial nerve (Figure 1C) projected along a single neural tract (Figure 1D)  
98 to the anterior central region of the SEZ. This neural tract served as an additional site to  
99 select arbors for reconstruction. Individual fibers followed along the same tract and  
100 showed variation in terminal branching (Figure 1E). In total, we identified 87 axonal  
101 projections in the right hemisphere. Tracing from the left labial nerve and neural tract in  
102 the left hemisphere, we identified 57 additional projections. Misalignments in the EM  
103 volume precluded identification of additional GRNs in the left hemisphere. Because there  
104 are 90-104 GRNs per labellum (Jaeger et al 2018, Stocker 1994 we estimate that we  
105 have identified 83-96% of the GRN fibers from the right labellum and 54-63% from the  
106 left. The projections from the left and right labial nerves are symmetric and converge in a  
107 dense web in the anterior central SEZ (Figure 1F). This arborization pattern recapitulates  
108 the labellar sensory projections of the ACSC (Hartenstein et al 2018). We confirmed that  
109 the reconstructed neurites overlap with the known projection pattern of sugar and bitter  
110 GRNs in the registered fly brain template (Figure 1 - figure supplement 1) (Bogovic et al  
111 2020), demonstrating that we have identified and traced GRNs.

112 In addition to the skeleton reconstructions, we manually annotated pre- and  
113 postsynaptic sites. The presence of T-shaped structures characteristic of presynaptic  
114 release sites ('T bars'), synaptic vesicles, and a synaptic cleft were used to identify a  
115 synapse, consistent with previous studies (Zheng et al 2018). Synapses are sparse along  
116 the main neuronal tract and abundant at the terminal arborizations (Figure 1E). Each GRN  
117 has a large number of pre- and post-synaptic sites intermixed along the arbors (Figure  
118 1E and G-I), characteristic of fly neurites (Bates et al 2020; Meinertzhagen 2018; Olsen  
119 & Wilson 2008; Takemura et al 2017). On average, a GRN contains 175 ( $\pm 6$  SE)  
120 presynaptic sites and 168 ( $\pm 6$  SE) postsynaptic sites, with individual GRNs showing wide  
121 variation in pre- and post- synapse number (Figure 1 - figure supplement 1B). GRNs are  
122 both pre- and post-synaptic to other GRNs, with each GRN receiving between 2% and  
123 66% (average = 39%) of its synaptic input from other GRNs (Figure 1 - figure supplement

124 1C). The large number of synapses between GRNs suggests that communication  
125 between sensory neurons may directly regulate sensory output.

126

### 127 **Different GRN classes can be identified by morphology and connectivity**

128 *Drosophila* GRNs comprise genetically defined, discrete populations that are  
129 specialized for the detection of specific taste modalities (Wang et al 2004, Cameron et al  
130 2010, Jaeger et al 2018). As the EM dataset does not contain molecular markers to  
131 distinguish between GRNs recognizing different taste modalities, we set out to identify  
132 subpopulations of reconstructed GRNs based on their anatomy and connectivity.

133 We performed hierarchical clustering of GRN axons to define different  
134 subpopulations based on their morphology and synaptic connectivity. GRNs of the right  
135 hemisphere were used in this analysis as the dataset is more complete. Each traced  
136 skeleton was registered to a standard template brain (Bogovic et al 2018) and  
137 morphological similarity was compared pairwise using NBLAST in an all-by-all matrix  
138 (Costa et al 2016). Then, GRN-GRN connectivity was added for each GRN skeleton and  
139 the resulting merged matrix was min/max scaled. We then used Ward's method to  
140 hierarchically cluster GRNs into groups (Ward 1963). We chose six groups as the number  
141 that minimizes within-cluster variance (Figure 2 - figure supplement 1A) (Braun et al  
142 2010). Each group is composed of 7-23 GRNs that occupy discrete zones in the SEZ and  
143 share anatomically similar terminal branches (Figure 2).

144 To evaluate whether the different groups represent GRNs detecting different  
145 taste modalities, we compared the anatomy of each group in the right hemisphere with  
146 that of known GRN classes, using NBLAST similarity scores. We registered EM  
147 reconstructed GRN projections and GRN projections from immunostained brains to the  
148 same standard brain template for direct comparisons (Bogovic et al 2020). For each  
149 group, we performed pairwise comparisons against bitter (Gr66a; Wang et al 2004,  
150 Thorne et al 2004), sugar (Gr64f; Dahanukar et al 2007), water (Ppk28; Cameron et al  
151 2010, Chen et al 2010), and low salt (Ir94e; Croset et al 2016, Jaeger et al 2018)  
152 projections. There is not a specific genetic marker for high salt projections, as Ppk23  
153 labels both bitter and high salt GRNs (Jaeger et al 2018). These comparisons (Methods,  
154 NBLAST analysis for taste modality assignment) revealed that group 1 and group 2 best

155 match bitter projections, forming a characteristic medial ringed web. Group 3 projections  
156 show greatest similarity to low salt GRNs, with distinctive dorsolateral branches. Groups  
157 4, 5 and 6 are anatomically very similar, and identity assignments are tentative. Group 6  
158 best matches water GRNs. Group 4 and group 5 best match sugar GRNs. Because  
159 group 4 shows greater similarity with sugar GRNs based on NBLAST scores and  
160 because it contains a dorsolateral branch seen in Gr64f projections and not seen in  
161 group 5 projections, we hypothesize that group 4 is composed of sugar GRNs and that  
162 the remaining group 5 is composed high salt GRNs. Comparison of each group with its  
163 GRN category best match in the 3-dimensional standard fly brain template supports the  
164 view that Group 1 and 2 are bitter GRNs, group 3 low-salt, group 4 sugar, and group 6  
165 water GRNs (Figure 3). Thus, morphological and connectivity clustering suggests  
166 molecular and functional identities of different GRNs.

167 An identical clustering analysis of GRNs from the left hemisphere yielded 7  
168 groups of 4-15 neurons (Figure 3 – figure supplement 1-2). Groups 1 and 2 best match  
169 bitter projections and group 6 best matches low salt projections (Methods, NBLAST  
170 analysis for taste modality assignment), with anatomy consistent with known projection  
171 patterns. Other groups are not well-resolved (Methods, NBLAST analysis for taste  
172 modality assignment), arguing that a more complete dataset is necessary to resolve  
173 GRN categories in the left hemisphere.

174

### 175 **GRNs are highly interconnected via chemical synapses**

176 As GRNs have a large number of synaptic connections with other GRNs (Figure 1  
177 - figure supplement C), we examined whether synapses exist exclusively between  
178 neurons of the same group, likely representing the same taste modality, or between  
179 multiple groups. The all-by-all connectivity matrix illustrated blocks of connectivity within  
180 groups, with fewer connections between groups (Figure 4A). To quantify this, we summed  
181 all GRN-GRN connections within and between groups. This analysis revealed that most  
182 synapses are between neurons of the same group (79%), while only 21% of the synapses  
183 are between GRNs of different groups (Figure 4B). For example, group 4 neurons receive  
184 1468 synapses from other group 4 neurons and 38 from group 3, 156 from group 5, and  
185 130 from group 6 neurons. Focusing on connections of five or more synapses between

186 GRN pairs, representing high confidence connections (Buhmann et al 2021, Li et al  
187 2020a, Takemura et al 2013, Takemura et al 2015), resulted in the elimination of some  
188 but not all between-group connections (Figure 4C), with between-group connections  
189 representing only 10% of all GRN connections.

190 The large numbers of chemical synapses between GRNs within a group may  
191 provide a mechanism to amplify signals of the same taste modality. In contrast, weak  
192 connectivity between GRNs of different groups may serve to integrate taste information  
193 from different modalities before transmission to downstream circuitry. We note that  
194 misclassification of individual GRNs in the clustering analysis may result in over- or  
195 underestimates of GRN connectivity within and between groups.

196

### 197 **Interactions between sugar and water GRNs are not observed by calcium or** 198 **voltage imaging**

199 To examine whether the small number of connections between GRNs of different  
200 taste modalities results in cross-activation of GRNs detecting different primary tastant  
201 classes, we tested if activation of one GRN class results in propagation of activity to other  
202 GRN classes *in vivo*. As the connectivity data suggests that sugar and water GRNs are  
203 weakly connected (Figure 4 B-C, group 4 and group 6), we wondered if appetitive GRNs  
204 might be interconnected to amplify appetitive signals to downstream feeding circuits. To  
205 test for interactions between appetitive GRNs, we undertook calcium and voltage imaging  
206 studies in which we monitored the response of a GRN class upon activation of other GRN  
207 classes.

208 We expressed the calcium indicator GCaMP6s in genetically defined sugar, water  
209 or bitter sensitive GRNs to monitor excitatory responses upon artificial activation of  
210 different GRN classes. To ensure robust and specific activation of GRNs, we expressed  
211 the mammalian ATP receptor P2X2 in sugar, water or bitter GRNs, and activated the  
212 GRNs with an ATP solution presented to the fly proboscis while imaging gustatory  
213 projections in the brain (Yao et al 2012, Harris et al 2015). Expressing both P2X2 and  
214 GCaMP6s in sugar, water or bitter GRNs elicited strong excitation upon ATP presentation  
215 (Figure 5A-B and G-H and Figure 5 - figure supplement 1-3 C-D), demonstrating the  
216 effectiveness of this method. As bitter cells are synaptically connected to each other but

217 not to sugar or water cells, we hypothesized that they would not be activated by sugar or  
218 water GRN activation. Consistent with the EM connectivity, activation of sugar or water  
219 GRNs did not activate bitter cells, nor did bitter cell activation elicit responses in sugar or  
220 water axons (Figure 5 - figure supplement 1E-H; Figure 5 - figure supplement 2E-F; Figure  
221 5 - figure supplement 3G-H). In contrast, the EM connectivity indicates possible  
222 interactions between sugar and water GRNs. However, we did not observe responses in  
223 sugar GRNs upon water GRN activation (Figure 5C-D; Figure 5 - figure supplement 2I-J)  
224 or responses in water GRNs upon sugar GRN activation (Figure 5I and J; Figure 4 - figure  
225 supplement 3E and F). To examine whether interactions between modalities are  
226 modulated by the feeding state of the fly, we performed the activation and imaging  
227 experiments in both fed and starved flies (Figure 5 - figure supplement 1-6). These  
228 experiments did not reveal feeding state-dependent interactions between GRN  
229 populations.

230 We reasoned that interactions between sugar and water GRNs might be inhibitory,  
231 providing a mechanism to weight different appetitive taste inputs. To examine this, we  
232 expressed the voltage indicator ArcLight (Cao et al 2013), which reliably reports  
233 hyperpolarization, in sugar GRNs while activating water GRNs via P2X2 and vice versa.  
234 These experiments revealed no change in voltage in one appetitive gustatory class upon  
235 activation of the other (Figure 5E-F and K-L; Figure 4 - figure supplement 7). Overall,  
236 despite the potential for crosstalk between different modalities revealed by EM, we  
237 observed no communication between appetitive GRNs by calcium or voltage imaging of  
238 gustatory axons.

## 239 240 **Discussion**

241 In this study, we characterized different classes of gustatory projections and their  
242 interconnectivity by high-resolution EM reconstruction. We identified different projection  
243 patterns corresponding to gustatory neurons recognizing different taste modalities. The  
244 extensive connections between GRNs of the same taste modality provide anatomical  
245 evidence of pre-synaptic processing of gustatory information.

246 An emerging theme stemming from EM reconstructions of *Drosophila* sensory  
247 systems is that sensory neurons of the same subclass are synaptically connected. In



248 general, different sensory neuron subclasses have spatially segregated axonal termini in  
249 the brain, thereby constraining the potential for connectivity. In the adult olfactory system,  
250 approximately 40% of the input onto olfactory receptor neurons (ORNs) comes from other  
251 ORNs projecting to the same olfactory glomerulus (Horne et al 2018, Schlegel et al 2021,  
252 Tobin et al 2017). Similarly, mechanosensory projections from the Johnston's Organ of  
253 the same submodality are anatomically segregated and synaptically connected (Hempel  
254 et al 2020). In *Drosophila* larvae, 25% of gustatory neuron inputs are from other GRNs,  
255 although functional classes were not resolved (Miroschnikow et al 2018). In the adult  
256 *Drosophila* gustatory system, we also find that GRNs are interconnected, with  
257 approximately 39% of GRN input coming from other GRNs. Consistent with other classes  
258 of sensory projections, we find that gustatory projections are largely segregated based  
259 on taste modality and form connected groups. A general function of sensory-sensory  
260 connections seen across sensory modalities may be to enhance weak signals or to  
261 increase dynamic range.

262 By clustering neurons based on anatomy and connectivity, we were able to resolve  
263 different GRN categories. The distinct morphologies of bitter neurons and low salt-  
264 sensing neurons, known from immunohistochemistry, are recapitulated in the projection  
265 patterns of GRN groups 1, 2 and 3 of the right hemisphere, enabling high-confidence  
266 identification. It is interesting that bitter projections cluster into two distinct groups,  
267 suggesting different subsets. We hypothesize that these reflect bitter GRNs from different  
268 taste bristle classes or bitter GRNs with different response properties (Dweck and Carlson  
269 2020). The projections of high salt, sugar and water-sensing neurons are ipsilateral, with  
270 similarities in their terminal arborizations (Jaeger et al 2018, Wang et al 2004).  
271 Nevertheless, comparisons between EM and light-level projections argue that these taste  
272 categories are also resolved into different, identifiable clusters. However, as these  
273 categories are based on anatomical comparisons alone, they remain tentative until further  
274 examination of taste response profiles of connected second-order neurons, may now be  
275 identified by EM tracing downstream of the reconstructed GRNs reported here.

276 Examining GRN-GRN connectivity revealed connectivity between GRNs of the  
277 same group as well as different groups. While it is tempting to speculate that interactions  
278 between different taste modalities may amplify or filter activation of feeding circuits, we



279 were unable to identify cross-activation between sugar and water GRNs by calcium or  
280 voltage imaging. It is possible that these interactions are dependent on a feeding state or  
281 act on a timeframe not examined in this study. Alternatively, activation may fall below the  
282 detection threshold of calcium or voltage imaging. Additionally, far fewer synapses occur  
283 between anatomical classes than within classes, especially restricting analyses to  
284 neurons connected by 5 or more synapses (Figure 4C), suggesting that the small number  
285 of synapses may not be relevant for taste processing. Finally, the anatomy and  
286 connectivity-based clustering may not categorize all individual GRNs correctly, and  
287 misclassification of GRNs would impact connectivity analyses. Regardless, our studies  
288 suggest that pre-synaptic connectivity between different GRN classes does not  
289 substantially contribute to taste processing.

290 Overall, this study resolves the majority of labellar gustatory projections and their  
291 synaptic connections, revealing that gustatory projections are segregated based on taste  
292 modality and synaptic connections. The identification of GRNs detecting different taste  
293 modalities now provides an inroad to enable the examination of the downstream circuits  
294 that integrate taste information and guide feeding decisions.

## 295 **Materials and Methods**

### 297 **Key Resources Table**

298

| <b>Reagent type (species) or resource</b> | <b>Designation</b> | <b>Source or reference</b> | <b>Identifiers</b>                  | <b>Additional information</b> |
|-------------------------------------------|--------------------|----------------------------|-------------------------------------|-------------------------------|
| Genetic reagent (D.melanogaster)          | Gr64f-Gal4 (II)    | (Kwon et al., 2011)        | BDSC: 57669<br>FLYB: FBti0162679    |                               |
| Genetic reagent (D.melanogaster)          | Gr64f-Gal4 (III)   | (Kwon et al., 2011)        | BDSC: 57668<br>FLYB:<br>FBti0162678 |                               |

|                                  |                                                               |                          |                                  |  |
|----------------------------------|---------------------------------------------------------------|--------------------------|----------------------------------|--|
| Genetic reagent (D.melanogaster) | Gr64f-LexA (III)                                              | (Miyamoto et al., 2012)  |                                  |  |
| Genetic reagent (D.melanogaster) | Gr66a-Gal4 (II)                                               | (Scott et al., 2001)     |                                  |  |
| Genetic reagent (D.melanogaster) | Gr66a-Lexa (III)                                              | (Thistle et al., 2012)   |                                  |  |
| Genetic reagent (D.melanogaster) | Ppk28-Gal4 (II)                                               | (Cameron et al., 2010)   |                                  |  |
| Genetic reagent (D.melanogaster) | Ppk28-LexA (III)                                              | (Thistle et al., 2012)   |                                  |  |
| Genetic reagent (D.melanogaster) | Ir94e-Gal4 (attp2)                                            | (Croset et al., 2016)    | BDSC: 81246<br>FLYB: FBti0202323 |  |
| Genetic reagent (D.melanogaster) | csChrimsonReporter/Optogenetic effector, 20xUAS-csChrimson::m | (Klapeetke et al., 2014) | BDSC:55134;<br>FLYB:FBst0055134  |  |

|                                  |                           |                             |                                  |  |
|----------------------------------|---------------------------|-----------------------------|----------------------------------|--|
|                                  | Venus in attP18           |                             |                                  |  |
| Genetic reagent (D.melanogaster) | UAS-Syt-HA;;              | (Robinson et al., 2002)     |                                  |  |
| Genetic reagent (D.melanogaster) | UAS-P2X2 (chr III)        | (Lima and Miesenbock, 2005) | BDSC: 91222<br>FLYB: FBst0091222 |  |
| Genetic reagent (D.melanogaster) | UAS-ArcLight (attp2)      | (Cao et al., 2013)          | BDSC: 51056<br>FLYB: FBst0051056 |  |
| Genetic reagent (D.melanogaster) | LexAop-GCaMP6s (attp5)    | (Chen et al., 2013)         | BDSC: 44589<br>FLYB: FBst0044589 |  |
| Genetic reagent (D.melanogaster) | LexAop-GCaMP6s (attp1)    | (Chen et al., 2013)         | BDSC: 44588<br>FLYB: FBst0044588 |  |
| Genetic reagent (D.melanogaster) | LexAop-Gal80 (X)          | (Thistle et al., 2012)      |                                  |  |
| Genetic reagent (D.melanogaster) | UAS-CD8::tdTomato (chr X) | (Thistle et al., 2012)      |                                  |  |

|                                  |                                              |                               |                                                        |        |
|----------------------------------|----------------------------------------------|-------------------------------|--------------------------------------------------------|--------|
| Genetic reagent (D.melanogaster) | UAS-CD8::tdTomato (II)                       | (Thistle et al., 2012)        |                                                        |        |
| Antibody                         | anti-Brp (mouse monoclonal)                  | DSHB, University of Iowa, USA | DSHB Cat# nc82, RRID: AB_2314866                       | 1/500  |
| Antibody                         | anti-GFP (rabbit polyclonal)                 | ThermoFisher Scientific       | ThermoFisher Scientific Cat# A11122, RRID: AB_221569   | 1/1000 |
| Antibody                         | anti-GFP (chicken polyclonal)                | ThermoFisher Scientific       | ThermoFisher Scientific Cat# A10262, RRID: AB_2534023  | 1/1000 |
| Antibody                         | anti-dsRed (rabbit polyclonal)               | Takara                        | Takara Bio Cat# 632496, RRID: AB_10013483              | 1/1000 |
| Antibody                         | anti-rabbit AlexaFluor488 (goat polyclonal)  | ThermoFisher Scientific       | ThermoFisher Scientific Cat# A11034, RRID: AB_2576217  | 1/100  |
| Antibody                         | anti-chicken AlexaFluor488 (goat polyclonal) | ThermoFisher Scientific       | ThermoFisher Scientific Cat# A11039', RRID: AB_2534096 | 1/100  |
| Antibody                         | anti-rabbit AlexaFluor568 (goat polyclonal)  | ThermoFisher Scientific       | ThermoFisher Scientific Cat#, A11036,                  | 1/100  |

|                               |                                                     |                                    |                                                                |                                                                               |
|-------------------------------|-----------------------------------------------------|------------------------------------|----------------------------------------------------------------|-------------------------------------------------------------------------------|
|                               |                                                     |                                    | RRID:<br>AB_10563566                                           |                                                                               |
| Antibody                      | anti-mouse<br>AlexaFluor647<br>(goat<br>polyclonal) | ThermoFisher<br>Scientific         | ThermoFisher<br>Scientific Cat#<br>A21236,<br>RRID: AB_2535805 | 1/100                                                                         |
| Chemical<br>Compound,<br>drug | Denatonium<br>Benzoate                              | MilliporeSigma                     | MilliporeSigma Cat#<br>D5765,<br>CAS: 3734-33-6                |                                                                               |
| Chemical<br>Compound,<br>drug | Caffeine                                            | MilliporeSigma                     | MilliporeSigma Cat#<br>C53,<br>CAS: 58-08-2                    |                                                                               |
| Chemical<br>Compound,<br>drug | Sucrose                                             | ThermoFisher<br>Scientific         | ThermoFisher<br>Scientific Cat#<br>AAA1558336,<br>CAS: 57-50-1 |                                                                               |
| Chemical<br>Compound,<br>drug | Polyethylene<br>Glycol (MW<br>3350)                 | MilliporeSigma                     | MilliporeSigma Cat#<br>P4338,<br>CAS: 25322-68-3               |                                                                               |
| Chemical<br>Compound,<br>drug | All trans-<br>Retinal                               | MilliporeSigma                     | MilliporeSigma Cat#<br>R2500,<br>CAS: 116-31-4                 |                                                                               |
| Software,<br>algorithm        | Fiji                                                | (Schindelin et al.,<br>2012)       | RRID:SCR_002285                                                | <a href="http://fiji.sc/">http://fiji.sc/</a>                                 |
| Software,<br>algorithm        | CATMAID                                             | (Schneider-Mizell et<br>al., 2016) | RRID:SCR_006278                                                | <a href="https://catmaid.readthedocs.io/">https://catmaid.readthedocs.io/</a> |

|                     |                                     |                                 |                 |                                                                                                           |
|---------------------|-------------------------------------|---------------------------------|-----------------|-----------------------------------------------------------------------------------------------------------|
| Software, algorithm | R Project for Statistical Computing | R Development Core Team, 2018   | RRID:SCR_001905 | <a href="https://www.r-project.org/">https://www.r-project.org/</a>                                       |
| Software, algorithm | NeuroAnatomy Toolbox                | (Jefferis and Manton, 2017)     | RRID:SCR_017248 | <a href="https://github.com/jefferis/nat">https://github.com/jefferis/nat</a>                             |
| Software, algorithm | Python                              | Python Software Foundation      | RRID:SCR_008394 | <a href="https://www.python.org/">https://www.python.org/</a>                                             |
| Software, algorithm | Jupyter Notebook                    | Project Jupyter                 | RRID:SCR_018315 | <a href="https://jupyter.org/">https://jupyter.org/</a>                                                   |
| Software, algorithm | Slidebook                           | Intelligent Imaging Innovations | RRID:SCR_014300 | <a href="https://www.intelligent-imaging.com/slidebook">https://www.intelligent-imaging.com/slidebook</a> |
| Software, algorithm | GraphPad Prism                      | GraphPad Software               | RRID:SCR_002798 | <a href="https://www.graphpad.com/">https://www.graphpad.com/</a>                                         |
| Software, algorithm | Cytoscape                           | (Shannon et al., 2003)          | RRID:SCR_003032 | <a href="https://cytoscape.org/">https://cytoscape.org/</a>                                               |
| Software, algorithm | Computational Morphometry Toolkit   | (Rohlfing and Maurer, 2003)     | RRID:SCR_002234 | <a href="https://www.nitrc.org/projects/cmtk/">https://www.nitrc.org/projects/cmtk/</a>                   |

299

### 300 **Experimental Animals**

301 Experimental animals were maintained on standard agar/molasses/cornmeal  
 302 medium at 25°C. For imaging experiments requiring food-deprived animals, flies were  
 303 placed in vials containing wet kimwipes for 23-26 hours prior to the experiment. For  
 304 behavioral experiments, flies were placed on food supplemented with 400µM trans-retinal  
 305 for 24 hours prior to the experiment.

306

## 307 **EM reconstruction**

308 Neuron skeletons were reconstructed in a serial sectioned transmission electron  
309 microscopy dataset of the whole fly brain (Zheng et al 2018) using the annotation software  
310 CATMAID (Saalfeld et al 2009). GRN projections were identified based on their extension  
311 into the labial nerve and localization to characteristic neural tracts in the SEZ. Skeletons  
312 were traced to completion either entirely manually or using a combination of an automated  
313 segmentation (Li et al 2020b) and manual tracing as previously described (Hempel et al  
314 2020). Chemical synapses were annotated manually and neurons were traced to synaptic  
315 completion, using criteria previously described (Zheng et al 2018). Skeletons were  
316 reviewed by a second specialist, so that the final reconstruction presents the consensus  
317 assessment of at least two specialists. Skeletons were exported from CATMAID as swc  
318 files for further analysis, and images of skeletons were exported directly from CATMAID.  
319 FAFB neuronal reconstructions will be available from Virtual Fly Brain  
320 (<https://fafb.catmaid.virtualflybrain.org/>).

## 321 **Clustering of GRNs**

322 GRNs were hierarchically clustered based on morphology and connectivity using  
323 NBLAST and synapse counts. First, GRN skeletons traced in FAFB were registered to  
324 the JRC2018U template (Bogovic et al 2018) and compared in an all-by-all fashion with  
325 NBLAST (Costa et al. 2016). NBLAST analysis was carried out with the natverse toolkit  
326 in R (Bates et al. 2020; R Development Core Team, <https://www.r-project.org/>). The  
327 resulting matrix of NBLAST scores was merged with a second matrix containing all-by-all  
328 synaptic connectivity counts for the same GRNs. The resulting merged matrix was min-  
329 max normalized such that all values fall within the range of 0 and 1. The merged,  
330 normalized matrix was hierarchically clustered using Ward's method (Ward 1963) in  
331 Python (Python Software Foundation, <https://www.python.org/>) with SciPy (Virtanen et al  
332 2020). The number of groups was chosen based on analysis of Ward's joining cost and  
333 the differential of Ward's joining cost.

334 Connectivity data of GRNs was exported from CATMAID for further analysis and  
335 connectivity diagrams were generated using CytoScape (Shannon et al 2003).

## 336 **NBLAST analysis for taste modality assignment**



337 GRN skeletons traced in FAFB were registered to the JRC2018U template and  
338 summed in FIJI to create a composite stack of the combined morphologies of all  
339 individual GRNs in a given group (as assigned by morphology and connectivity  
340 clustering). The morphology of the composite stack for each group was compared to an  
341 image library of GRN projection patterns using NBLAST (Costa et al. 2016). The image  
342 library contained projection patterns of Gr66a-GAL4, Gr64f-GAL4, Ir94e-GAL4, and  
343 Gr64f-GAL4 brains, 3 per genotype, registered to the JRC2018U template, prepared as  
344 described (see the “Immunohistochemistry” section below). Group identity was assigned  
345 based on the top hit from the image library. Following NBLAST analysis, the anatomy of  
346 each group was compared to the projection pattern of its top hit using VVDViewer.

347 NBLAST of groups in the right hemisphere against known GRN categories  
348 yielded the following top GRN matches, (NBLAST score): Group 1, Gr66a-GAL4 #1  
349 (47367); Group 2, Gr66a-GAL4 #1 (55586); Group 3, Ir94e-GAL4 #2 (67719); Group 4,  
350 Gr64f-GAL4 #2 (65797); Group 5, Gr64f-GAL4 #2 (56161); Group 6, Ppk28-GAL4 #1  
351 (58018). NBLAST of groups in the left hemisphere against known GRN categories  
352 yielded the following top GRN matches, (NBLAST score): Group 1, Gr66a-GAL4 #3  
353 (36848); Group 2, Gr66a-GAL4 #3 (34344); Group 3, Gr64f-GAL4 #2 (10776); Group 4,  
354 Gr64f-GAL4 #2 (43049); Group 5, Gr64f-GAL4 #2 (18544); Group 6, Ir93a-GAL4 #2  
355 (22987).; Group 7, Gr66a-GAL4 #2 (48780).

### 356 **Calcium and Voltage Imaging Preparation**

357 For imaging studies of GRNs, mated females, 10 to 21 days post eclosion, were  
358 dissected as previously described (Harris et al 2015), so that the brain was submerged in  
359 artificial hemolymph (AHL) (Wang et al 2003) while the proboscis was kept dry and  
360 accessible for taste stimulation. To avoid occlusion of taste projections in the SEZ, the  
361 esophagus was cut. The front legs were removed for tastant delivery to the proboscis.  
362 AHL osmolality was assessed as previously described (Jourjine et al 2016) and adjusted  
363 according to the feeding status of the animal. In fed flies, AHL of ~250mOsm was used  
364 (Wang et al 2003). The AHL used for starved flies was diluted until the osmolality was  
365 ~180mOsm, consistent with measurements of the hemolymph osmolality in food deprived  
366 flies (Jourjine et al 2016).

### 367 **Calcium Imaging**

368 Calcium transients reported by GCaMP6s and GCaMP7s were imaged on a 3i  
369 spinning disk confocal microscope with a piezo drive and a 20x water immersion objective  
370 (NA=1). For our studies of GRNs, stacks of 14 z-sections, spaced 1.5 microns apart, were  
371 captured with a 488nm laser for 45 consecutive timepoints with an imaging speed of ~0.3  
372 Hz and an optical zoom of 2.0. For better signal detection, signals were binned 8x8,  
373 except for Gr64f projections, which underwent 4x4 binning.

### 374 **Voltage Imaging**

375 Voltage responses reported by ArcLight were imaged similarly to the calcium  
376 imaging studies. To increase imaging speed, the number of z planes was reduced to 10,  
377 and the exposure time was decreased from 100ms to 75ms, resulting in an imaging speed  
378 of ~0.7Hz. To maintain a time course comparable to that of the calcium imaging  
379 experiments of GRNs, the number of timepoints was increased to 90. Signals were binned  
380 8x8 in each experiment.

### 381 **Taste stimulations**

382 Taste stimuli were delivered to the proboscis via a glass capillary as previously  
383 described (Harris et al 2015). For GRN studies, each fly was subjected to three  
384 consecutive imaging sessions, each consisting of a taste stimulation at time point 15, 25  
385 and 35 (corresponding to 30, 50.5, 71.5 sec). During the first imaging session, the fly was  
386 presented with a tasteless 20% polyethylene glycol (PEG, average molecular weight 3350  
387 g/mol) solution, acting as a negative control. PEG was used in all solutions except water  
388 solutions, as this PEG concentration inhibits activation of water GRNs (Cameron et al  
389 2010). This was followed in the second session with stimulations with 100mM ATP in  
390 20%PEG. In the last imaging session, each fly was presented with a tastant acting as a  
391 positive control in 20% PEG (Gr64f: 1M sucrose; Gr66a: 100mM caffeine, 10mM  
392 denatonium benzoate; ppk28: H<sub>2</sub>O; ppk23: 1M KCl in 20% PEG).

### 393 **Imaging Analysis**

394 Image analysis was performed in FIJI (Schindelin et al 2012). Z stacks for each  
395 time point were converted into maximum z-projections for further analysis. After  
396 combining these images into an image stack, they were aligned using the StackReg  
397 plugin in FIJI to correct for movement in the xy plane (Thevenaz et al 1998).

398 For our exploration of interactions between GRN subtypes, one ROI was selected  
399 encompassing the central arborization of the taste projection in the left or right  
400 hemisphere of the SEZ in each fly. Whether the projection in the left or right hemisphere  
401 was chosen depended on the strength of their visually gauged response to the positive  
402 control. The exception was Gr66a projections, in which the entire central projection  
403 served as ROI. If projections did not respond strongly to at least two of the three  
404 presentations of the positive control, the fly was excluded from further analysis. If  
405 projections responded to two or more presentations of the negative control, the fly was  
406 excluded from further analysis. A large ROI containing no GCaMP signal was chosen in  
407 the lateral SEZ to determine background fluorescence.

408 In calcium imaging experiments, the first five time points of each imaging session  
409 were discarded, leaving 40 time points for analysis with taste stimulations at time points  
410 10, 20 and 30. The average fluorescence intensity of the background ROI was subtracted  
411 at each time point from that of the taste projection ROI. F<sub>0</sub> was then defined as the  
412 average fluorescence intensity of the taste projection ROI post background subtraction of  
413 the first five time points.  $\Delta F/F$  (%) was calculated as  $100\% * (F(t)-F_0)/F_0$ . Voltage imaging  
414 experiments were analyzed similarly, with ten initial time points discarded for a total of 80  
415 time points in the analysis and tastant presentations at time points 20, 40 and 60.

#### 416 **Quantification of Calcium and Voltage Imaging**

417 Graphs were generated in GraphPad Prism. To calculate the max  $\Delta F/F$  (%) of  
418 GCaMP responses, the  $\Delta F/F$ (%) of the three time points centered on the peak  $\Delta F/F$  (%)  
419 after the first stimulus response were averaged. The average  $\Delta F/F$  (%) of the three time  
420 points immediately preceding the stimulus onset were then subtracted to account for  
421 changing baselines during imaging. Arclight data was similarly analyzed, except that five  
422 timepoints centered on the peak  $\Delta F/F$  (%) and five time points prior to stimulus onset were  
423 considered. Statistical tests were performed in Prism.

#### 424 **Immunohistochemistry**

425 To visualize GRN projections with light microscopy, males of Gr64f-GAL4, Gr66a-  
426 GAL4, Ir94e-GAL4, or Ppk28-GAL4 were crossed to virgins of UAS-Syt-HA, 20XUAS-  
427 CsChrimson-mVenus (attP18). Dissection and staining were carried out by FlyLight  
428 (Gr64f-GAL4 and Gr66a-GAL4) or in house (Ir94e-GAL4 and Ppk28-GAL4) according to

429 the FlyLight ‘IHC-Polarity Sequential Case 5’ protocol ([https://www.janelia.org/project-](https://www.janelia.org/project-team/flylight/protocols)  
430 [team/flylight/protocols](https://www.janelia.org/project-team/flylight/protocols)). Samples were imaged on an LSM710 confocal microscope  
431 (Zeiss) with a Plan-Apochromat 20×/0.8 M27 objective. Images were then registered to  
432 the 2018U template using CMTK (<https://www.nitrc.org/projects/cmtk>) and manually  
433 segmented with VVDViewer ([https://github.com/takashi310/VVD\\_Viewer](https://github.com/takashi310/VVD_Viewer); Otsuna et al.,  
434 2018) in order to remove any non-specific background; Otsuna et al., 2018) in order to  
435 remove any non-specific background.

436

### 437 **Acknowledgements**

438 We thank Lori Horhor, Jolie Huang, Neil Ming, and Parisa Vaziri for EM tracing  
439 contributions. This work was supported by NIH R01DC013280 (K.S.) and NIH  
440 F32DK117671 (G.S.). We thank John Bogovic for registration of EM skeletons in the  
441 2018U template. Neuronal reconstruction for this project took place in a collaborative  
442 CATMAID environment in which 27 labs are participating to build connectomes for  
443 specific circuits. Development and administration of the FAFB tracing environment and  
444 analysis tools were funded in part by National Institutes of Health BRAIN Initiative grant  
445 1RF1MH120679-01 to Davi Bock and Greg Jefferis, with software development effort and  
446 administrative support provided by Tom Kazimiers (Kazmos GmbH) and Eric Perlman  
447 (Yikes LLC). Peter Li, Viren Jain and colleagues at Google Research shared automatic  
448 segmentation (Li et al 2019). Members of the Scott lab and David T. Harris provided  
449 comments on the manuscript.

450

451

452

453

454

455

456

457

458

459

## Figure 1

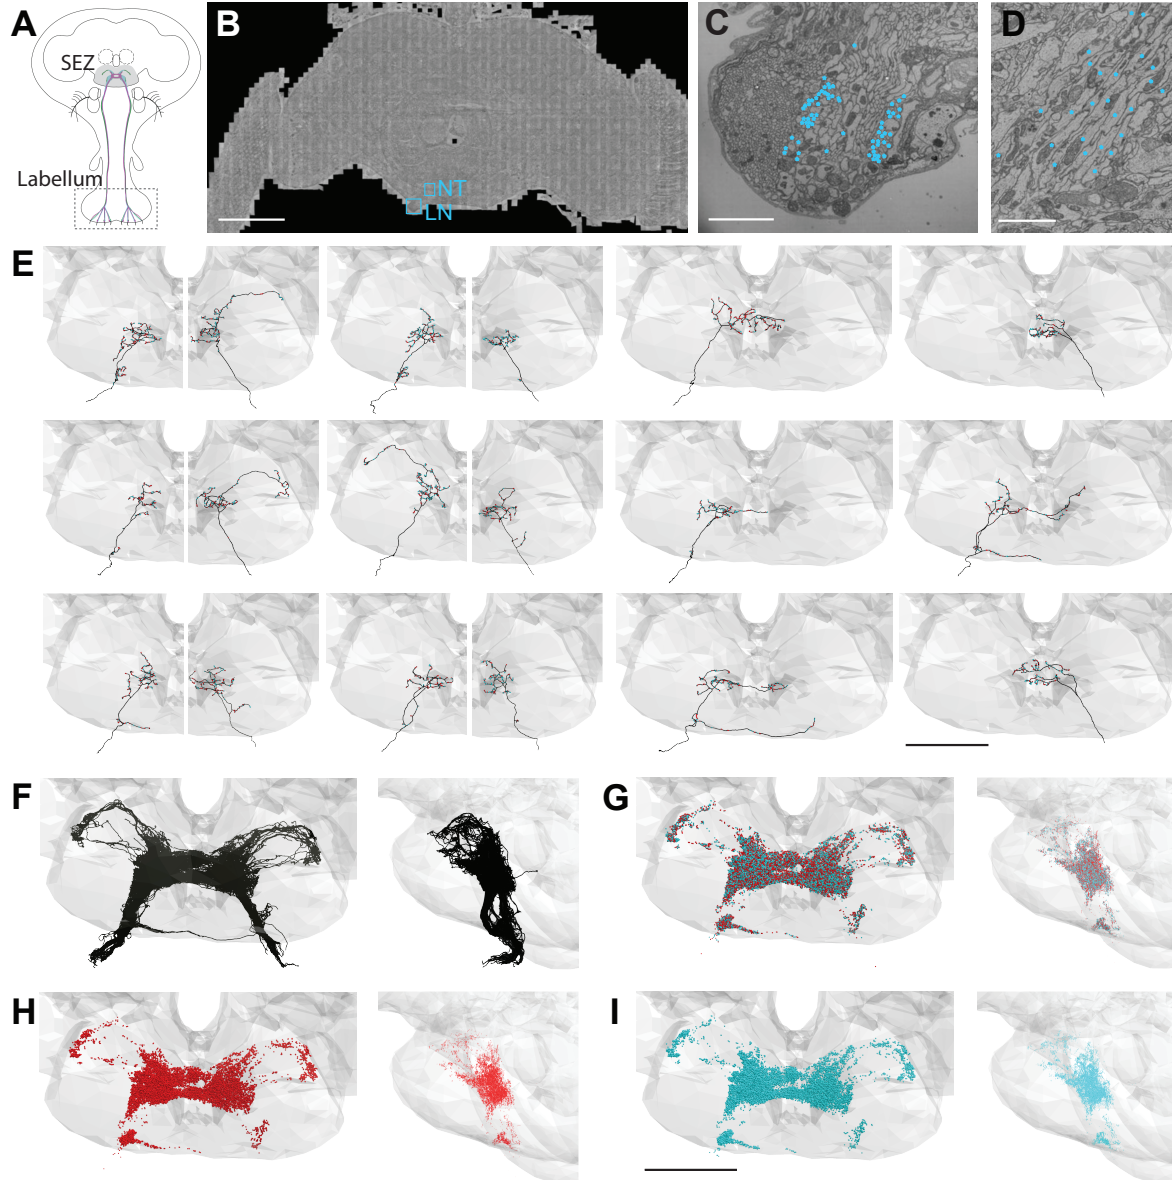

**Figure 1. EM-based reconstructions of GRNs and synaptic sites.** (A) Schematic showing GRNs in the proboscis labellum and their projections in the SEZ. (B) Location of the labial nerve (LN) and neural tract (NT) containing GRNs of the right hemisphere in the FAFB dataset (Z slice 3320, scale bar = 100 μm). (C) Cross-section of the labial nerve with traced GRNs indicated by asterisks (Z slice 3320, scale bar = 5 μm). (D) Neural tract with traced GRNs indicated by asterisks (Z slice 2770, scale bar = 5 μm). (E) Examples of reconstructed GRNs with presynaptic (red) and postsynaptic (blue) sites, scale bar = 50 μm. (F-I) Frontal and sagittal view of all reconstructed GRN axons

(F), all presynaptic (red) and postsynaptic (blue) sites (G), presynaptic sites alone (H), and postsynaptic sites alone (I) Scale bar = 50  $\mu$ M.



**Figure 1 – figure supplement 1**

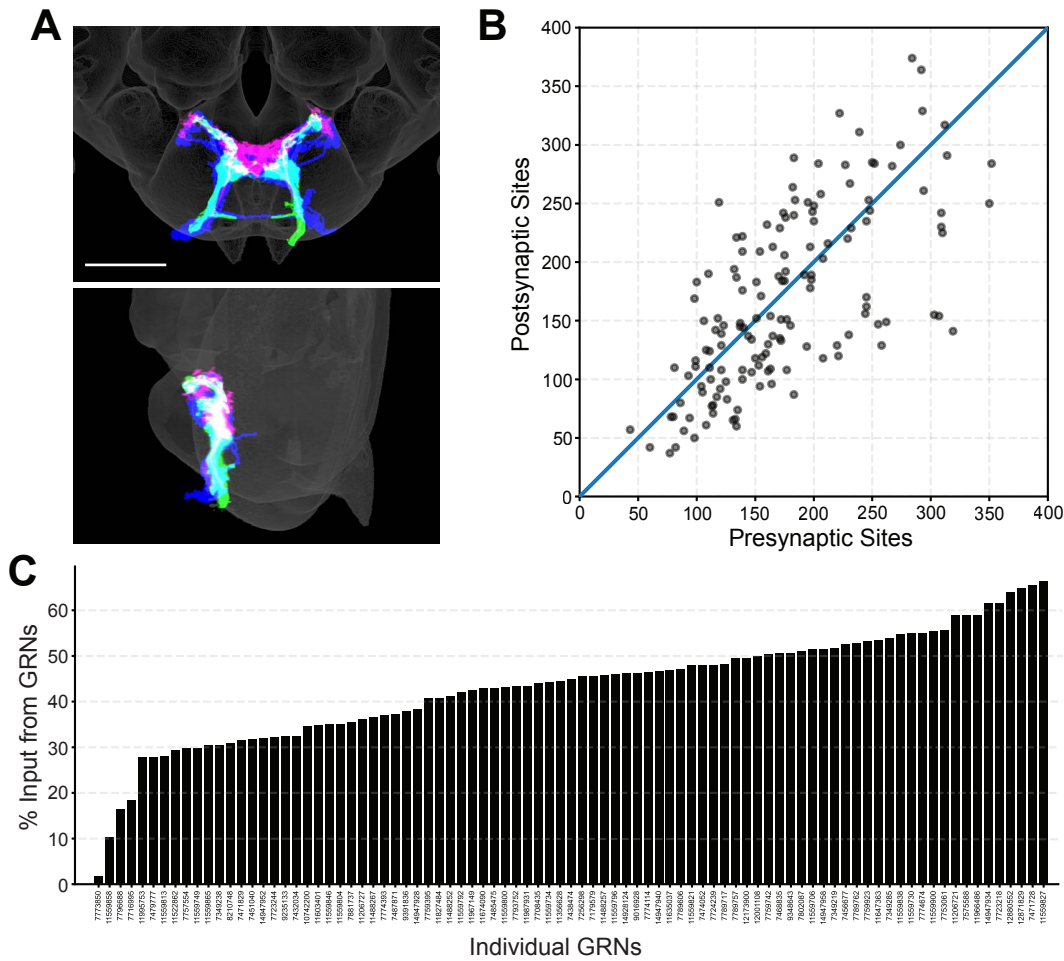

**Figure 1 - figure supplement 1. Morphology and connectivity of reconstructed GRN skeletons.** (A) Overlap of reconstructed GRNs (dark blue) with the projection patterns of bitter (magenta) and sugar (green) GRNs in the 2018U template brain, frontal view (top) and sagittal view (bottom), scale bar = 50  $\mu$ m. (B) Plot of pre- and post-synaptic sites for individual GRNs of the right hemisphere, denoted by grey circles. Diagonal line indicates one-to-one relationship of pre- and post-synaptic sites. (C) Percentage of GRN inputs to each GRN, for GRNs of the right hemisphere.



**Figure 2**

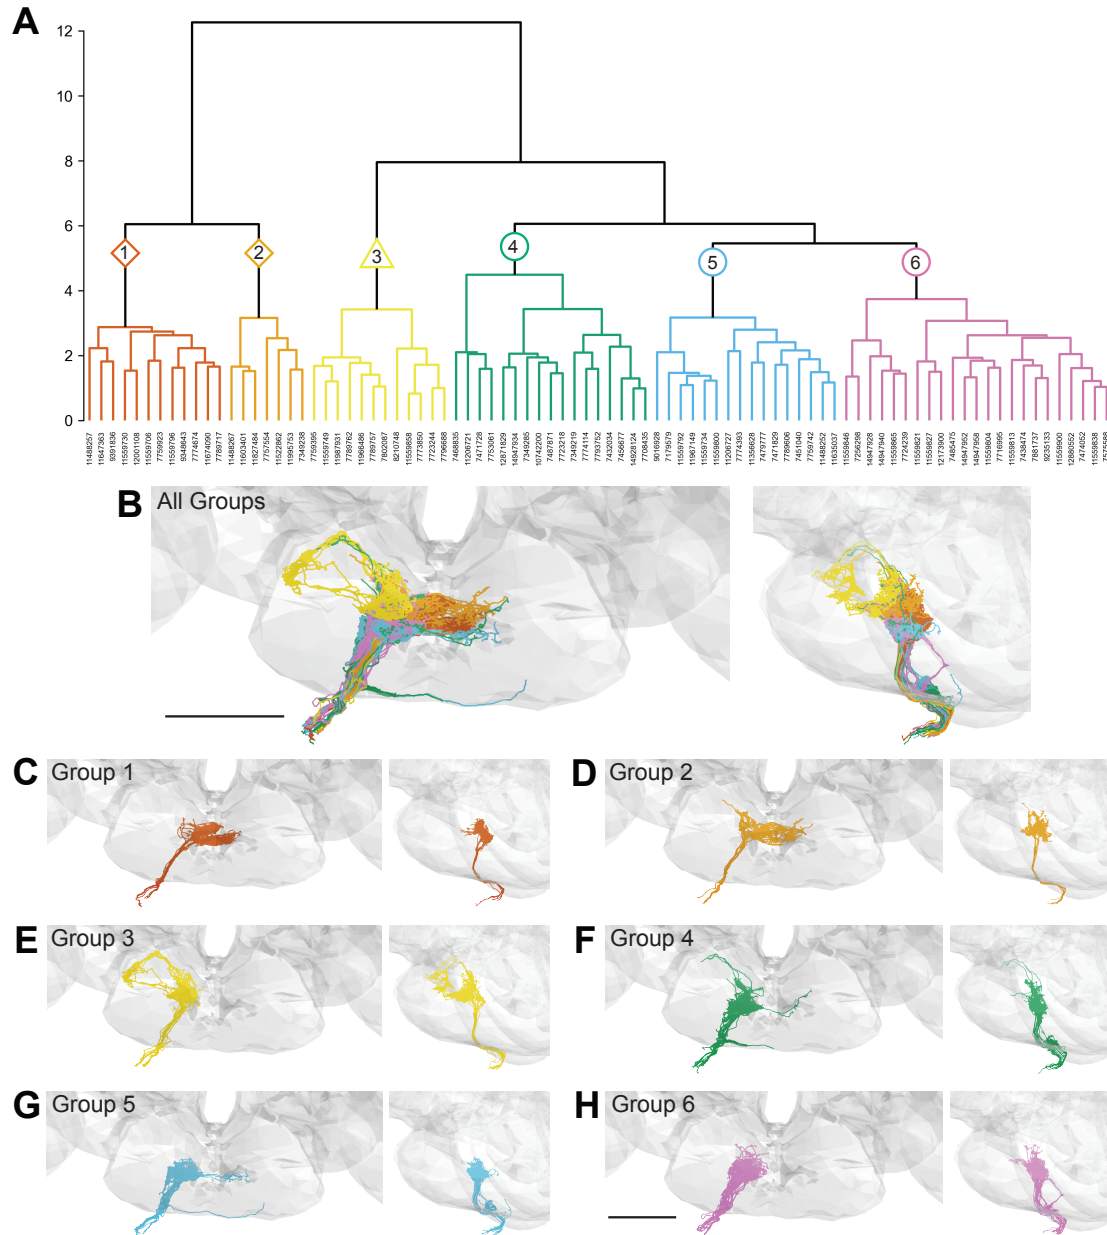

**Figure 2. Morphology- and connectivity-based clustering generates distinct groups of GRNs.** (A) Tree denoting relative similarity of GRNs based on morphology and connectivity of GRNs in the right hemisphere. (B) Frontal and sagittal view of all GRN groups, colored according to A. (C-H) Frontal and sagittal view of group 1 - group 6 GRNs, scale bar = 50  $\mu$ m.

**Figure 2 – figure supplement 1**

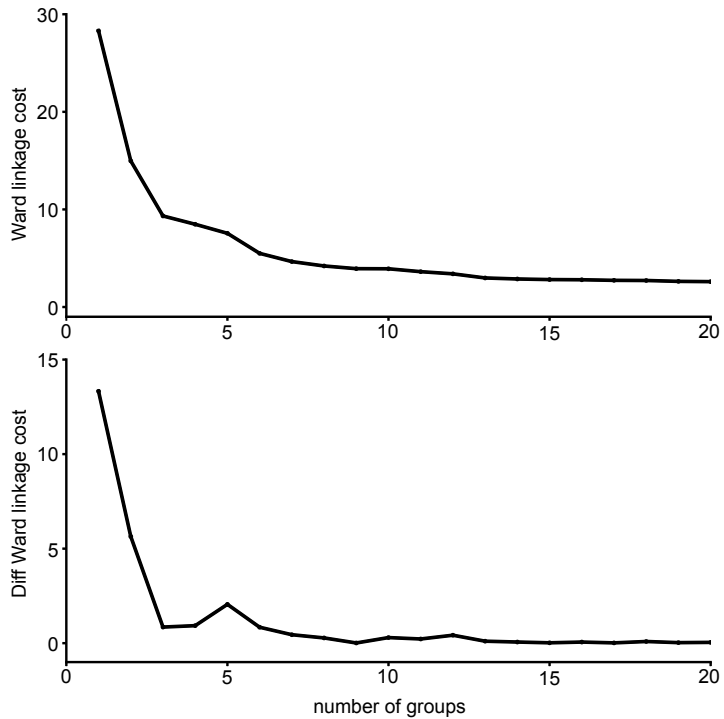

**Figure 2 - figure supplement 1. Ward's joining cost and the differential of Ward's joining cost for hierarchical clustering of GRNs in the right hemisphere.** (top) Ward's joining cost for clustering into groups. Ward's joining cost declines sharply when clustering with six groups as compared to clustering with fewer than six groups. (bottom) Differential of Ward's joining cost for clustering into groups. The differential is high when clustering into five groups or fewer but does not decline notably after six groups is reached.

### Figure 3

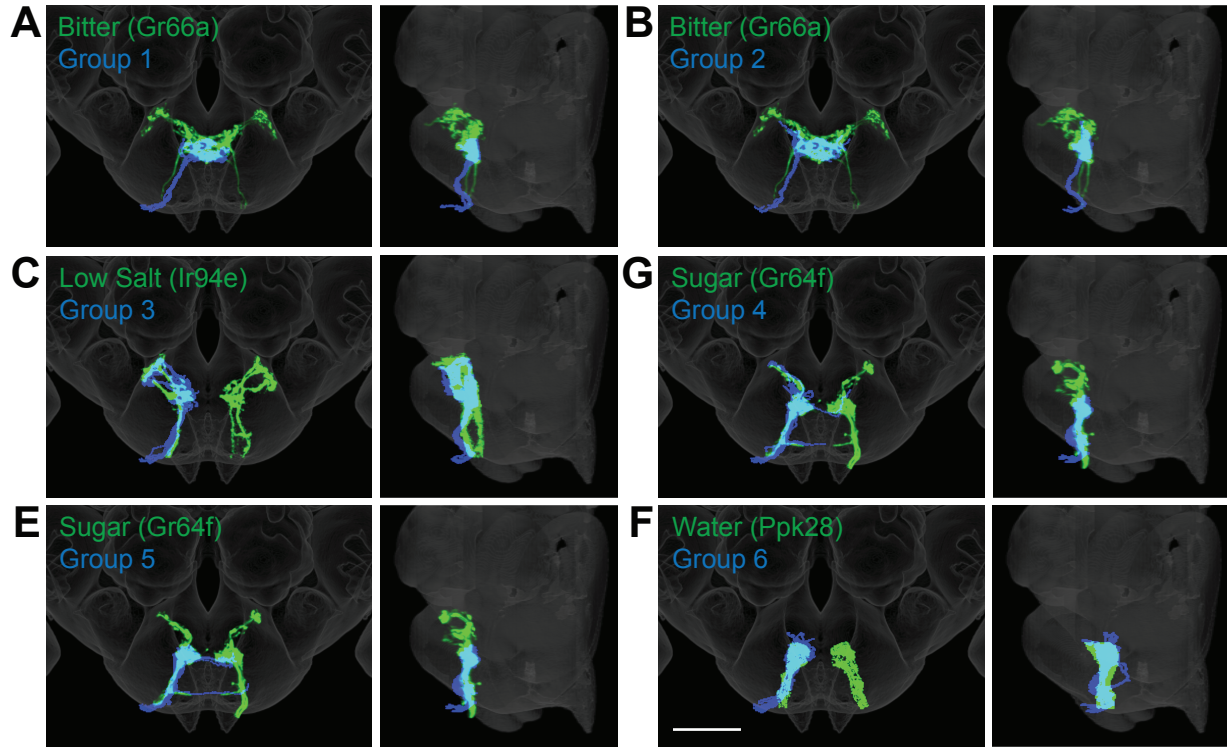

**Figure 3. Anatomy of different GRN groups overlays with GRNs of different taste categories.** NBLAST comparisons yielded best matches of EM groups and GRNs of different taste classes. A-F. Overlain are EM Groups 1-6 (blue) and best NBLAST match (green), frontal view (left) and sagittal view (right), scale bar = 50  $\mu$ M.

**Figure 3 – figure supplement 1**

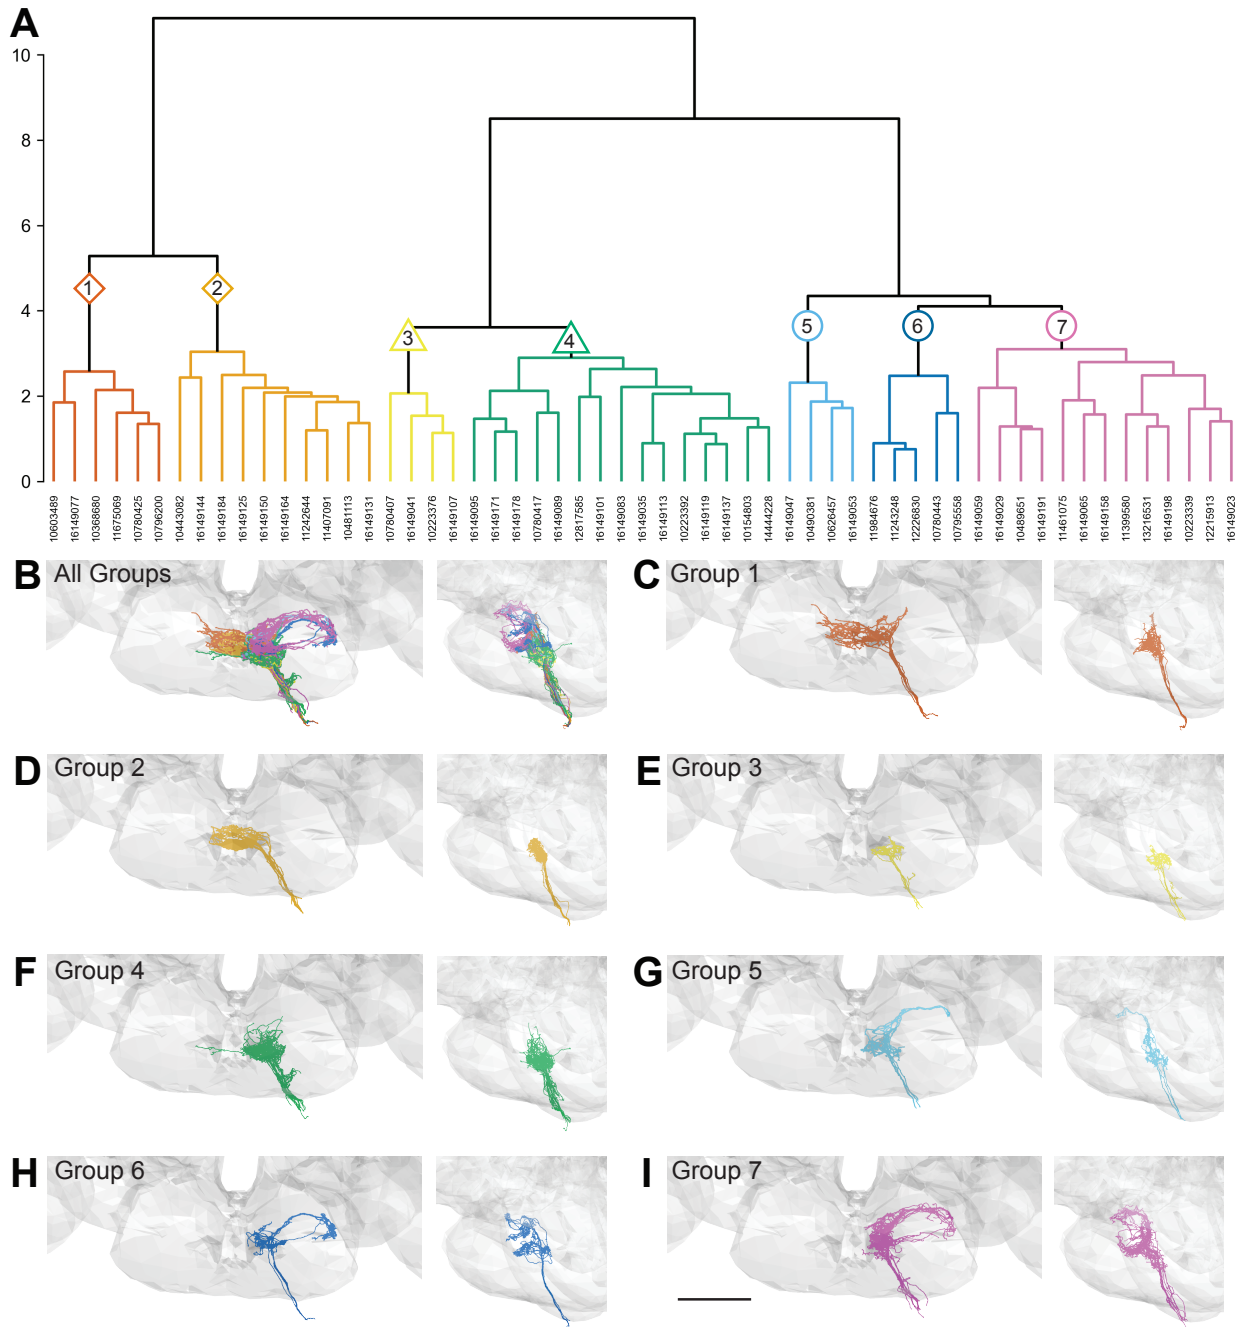

**Figure 3 – figure supplement 1. Morphology- and connectivity-based clustering generates distinct groups of GRNs.** (A) Tree denoting relative similarity of GRNs based on morphology and connectivity of GRNs in the left hemisphere. (B) Frontal and sagittal view of all GRN groups, colored according to A. (C-H) Frontal and sagittal view of group 1 - group 7 GRNs, scale bar = 50  $\mu$ m.

**Figure 3 – figure supplement 2**

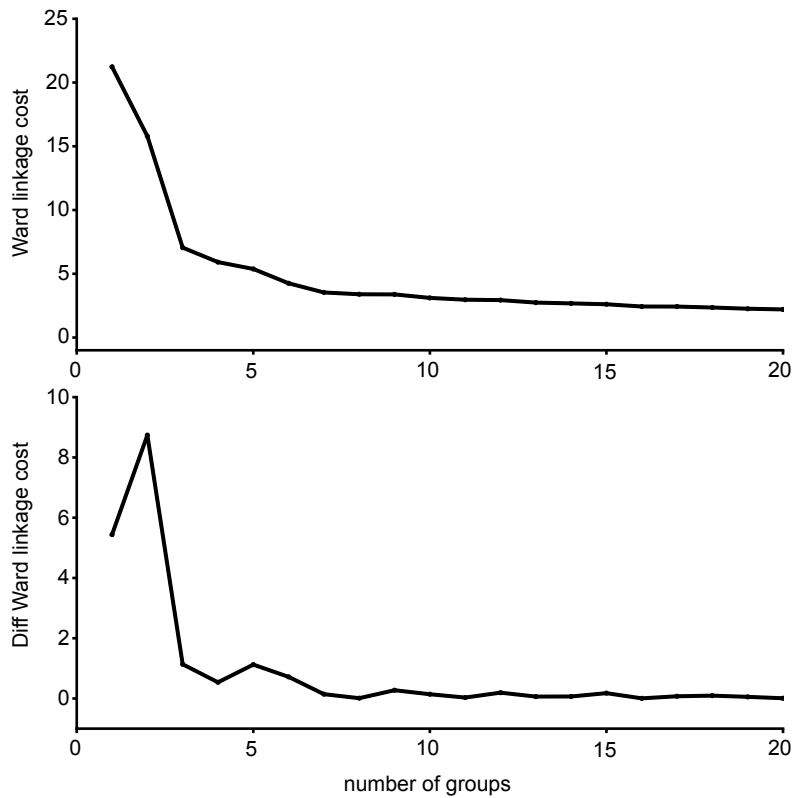

**Figure 3 - figure supplement 2. Ward's joining cost and the differential of Ward's joining cost for hierarchical clustering of GRNs in the left hemisphere. (top)** Ward's joining cost for clustering into groups. Ward's joining cost declines sharply when clustering with seven groups as compared to clustering with fewer than seven groups. **(bottom)** Differential of Ward's joining cost for clustering into groups. The differential is high when clustering into six groups or fewer but does not decline notably after seven groups is reached.

**Figure 4**

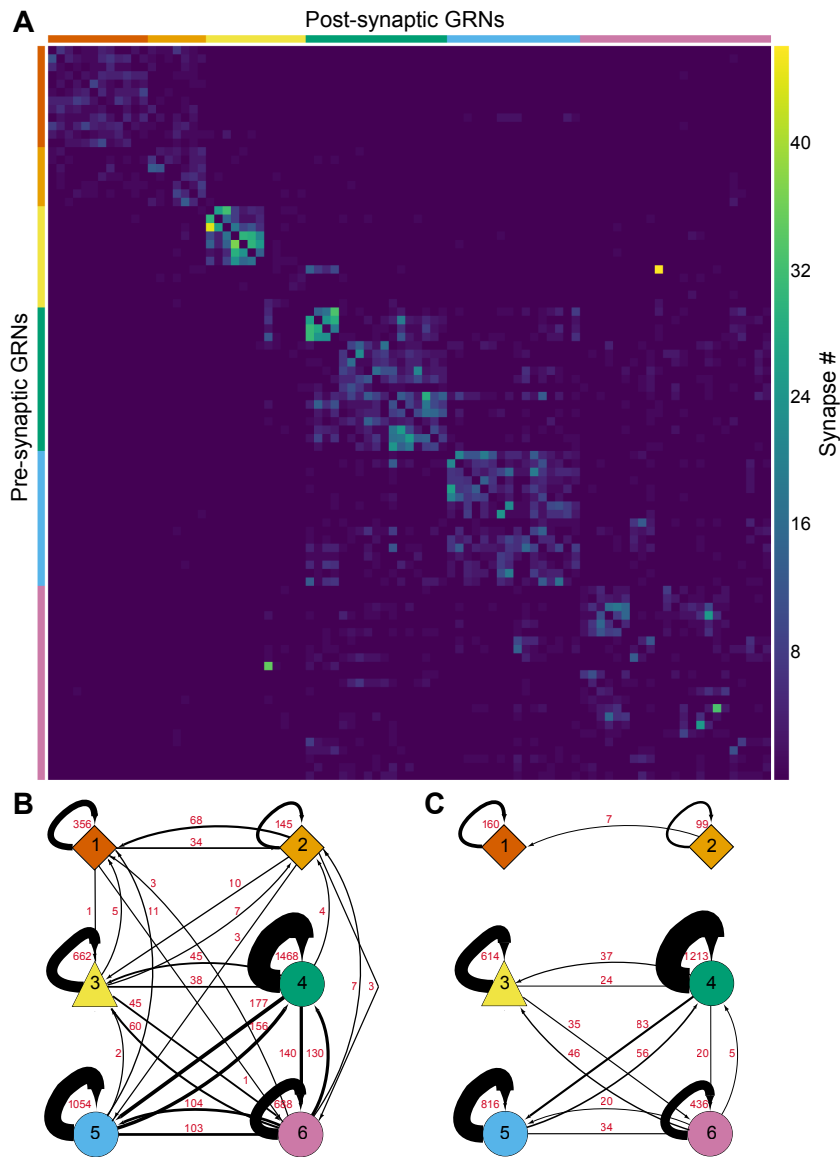

**Figure 4. GRNs are highly interconnected via chemical synapses.** (A) Connectivity matrix of GRNs in the right hemisphere. GRNs groups are color-coded and ordered according to Figure 2. Color coding within the matrix indicates the number of synapses from the pre- to the post-synaptic neuron, indicated in the legend. (B) Connectivity between GRN groups. Colors correspond to groups in Figure 2. Arrow thickness scales with the number of synapses, indicated in red. (C) Connectivity between GRN groups as in B, showing only connections of 5 or more synapses.

**Figure 5**

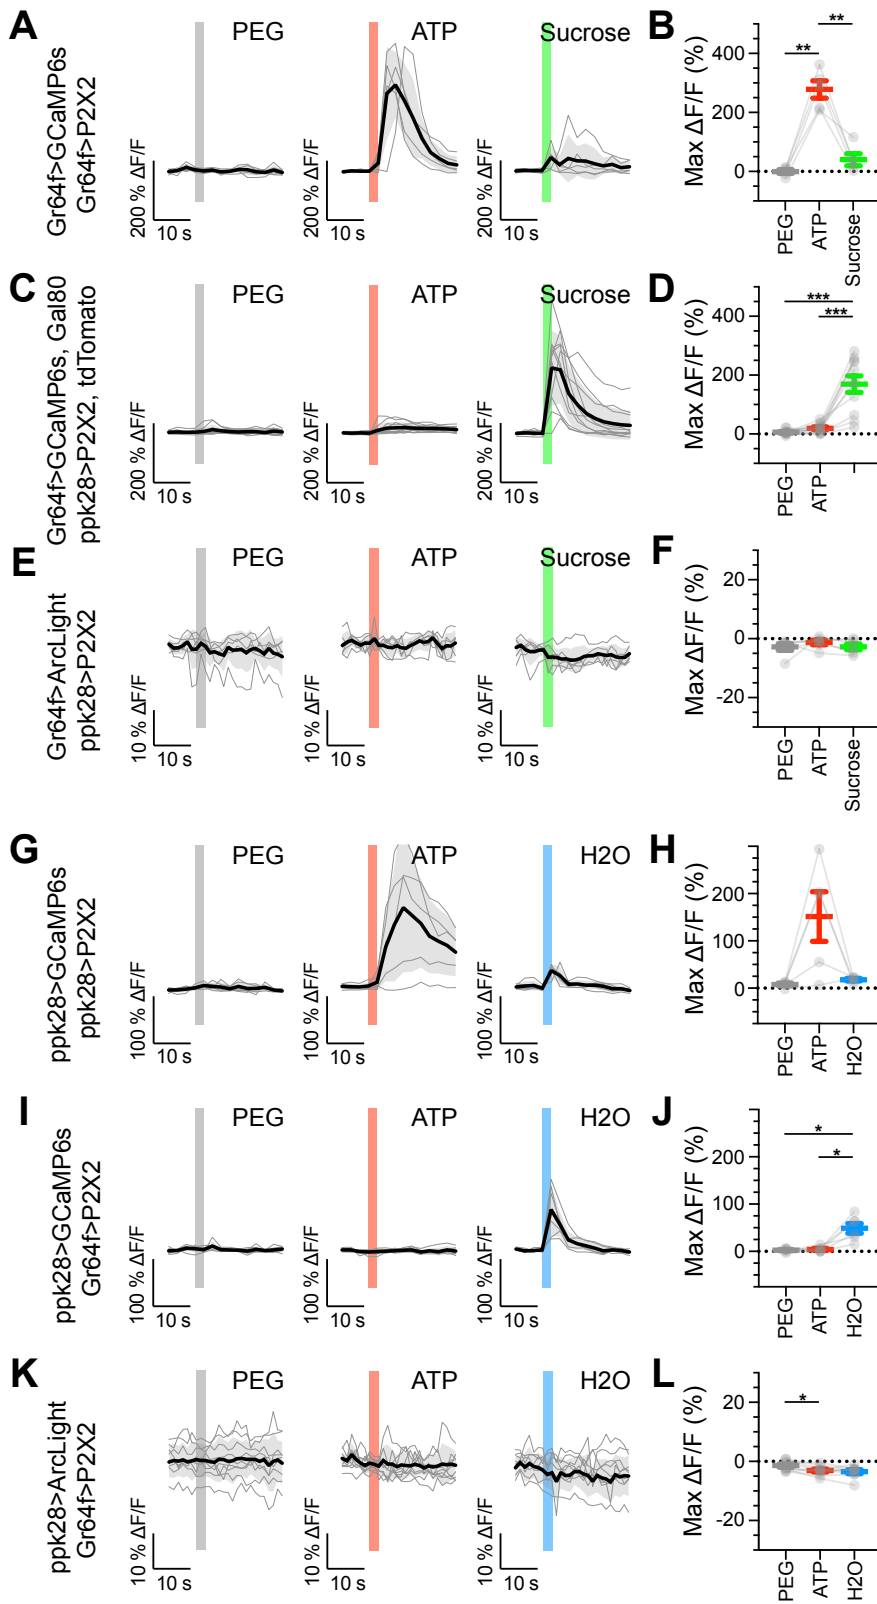



**Figure 5. Sugar and water GRNs do not activate each other.**

(A, B) Calcium responses of sugar GRNs expressing P2X2 and GCaMP6s to proboscis presentation of PEG as a negative control, ATP to activate P2X2, or sucrose as a positive control. GCaMP6s fluorescence traces ( $\Delta F/F$ ) (A) and maximum  $\Delta F/F$  post stimulus presentation (B),  $n = 5$ . Sugar GRNs responded to ATP, but the response to subsequent sucrose presentation was attenuated. (C, D) GCaMP6s responses of sugar GRNs in flies expressing P2X2 in water GRNs to PEG, ATP, and sucrose delivery,  $\Delta F/F$  traces (C) and maximum  $\Delta F/F$  graph (D),  $n = 11$ . (E, F) ArcLight responses of sugar GRNs in flies expressing P2X2 in water GRNs,  $\Delta F/F$  traces (E) and maximum  $\Delta F/F$  graph (F),  $n = 6$ . (G, H) Calcium responses of water GRNs expressing P2X2 and GCaMP6s to proboscis delivery of PEG (negative control), ATP, and water (positive control),  $\Delta F/F$  traces (G) and maximum  $\Delta F/F$  graph (H),  $n = 5$ . Water GRNs responded to ATP presentation, but the subsequent response to water was diminished. (I, J) GCaMP6s responses of water GRNs in flies expressing P2X2 in sugar GRNs to PEG, ATP, and water,  $\Delta F/F$  traces (I) and maximum  $\Delta F/F$  graph (J),  $n = 6$ . (K, L) ArcLight responses of water GRNs in flies expressing P2X2 in sugar GRNs to PEG, ATP, and water,  $\Delta F/F$  traces (K) and maximum  $\Delta F/F$  graph (L),  $n = 9$ .

For all traces, stimulus presentation is indicated by shaded bars. Traces of individual flies to the first of three taste stimulations (shown in Figure 5 – Figure supplements 2, 3 and 7) are shown in grey, the average in black, with the SEM indicated by the grey shaded area. Repeated measures ANOVA with Tukey's multiple comparisons test, \* $p < 0.05$ , \*\* $p < 0.01$ , \*\*\* $p < 0.001$ .

**Figure 5 - figure supplement 1**

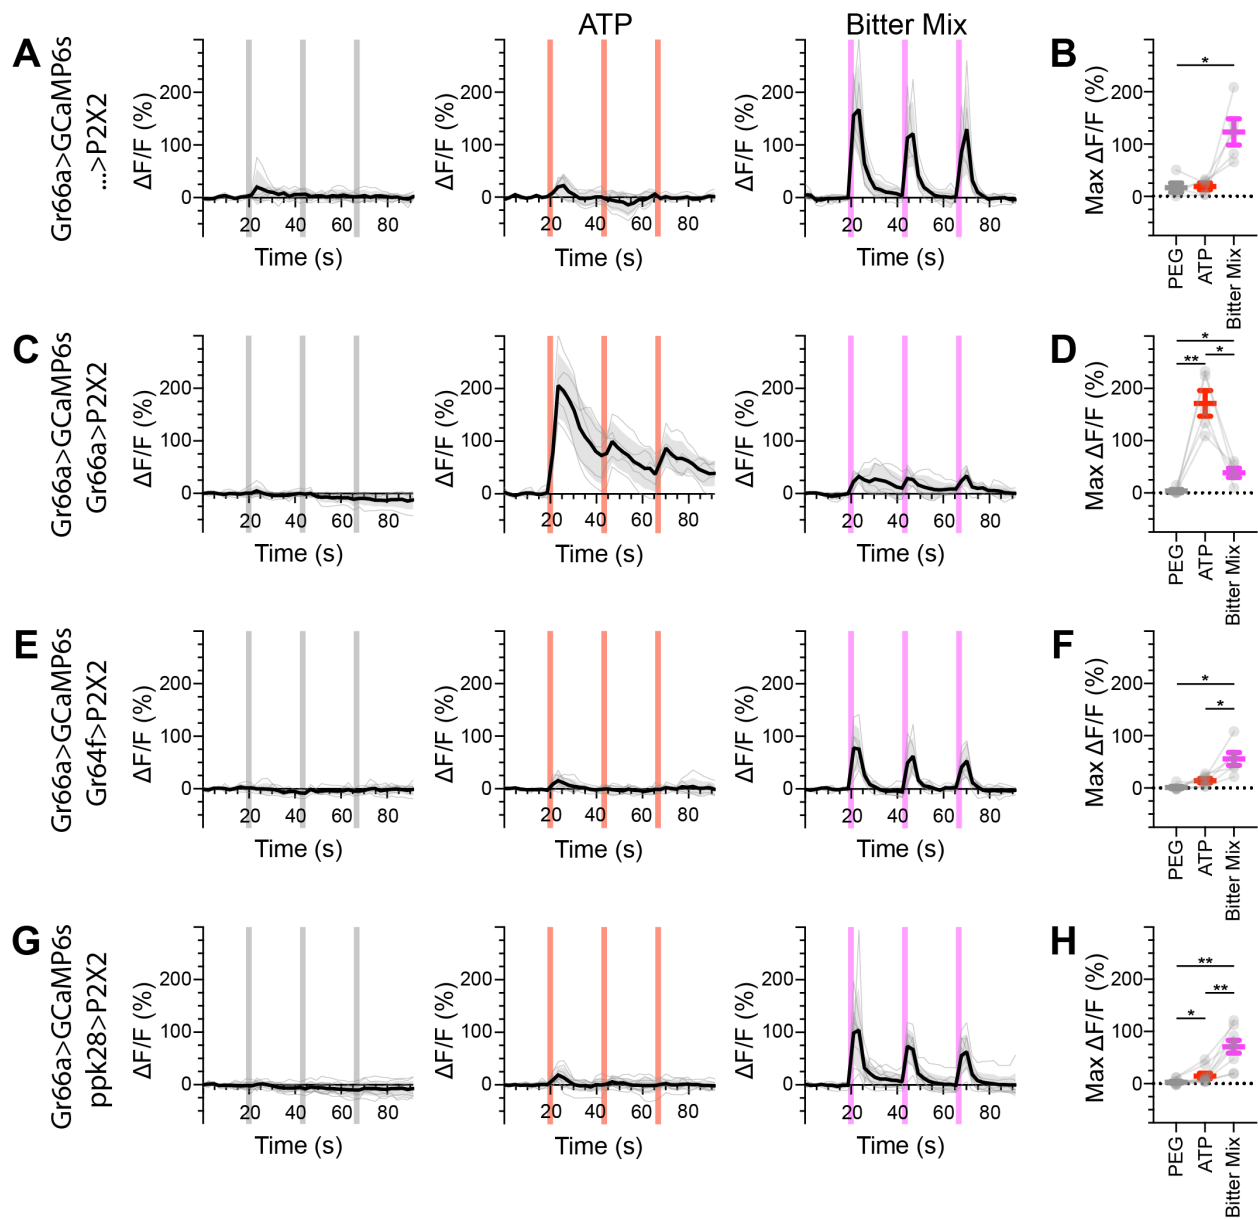

**Figure 5 - figure supplement 1. Bitter GRNs do not respond to the activation of other GRN classes in fed flies.**

(A, B) Calcium responses of bitter GRNs expressing GCaMP6s in a UAS-P2X2 background to proboscis presentation of PEG as a negative control, ATP, or a mixture of denatonium and caffeine, which are bitter compounds, as a positive control, GCaMP6s  $\Delta F/F$  traces (A) and maximum  $\Delta F/F$  graph (B),  $n = 5$ . (C, D) Calcium responses of bitter GRNs expressing GCaMP6s and P2X2 to PEG, ATP, or bitter delivery,  $\Delta F/F$  traces (C) and maximum  $\Delta F/F$  graph (D),  $n = 5$ . (E, F) GCaMP6s responses of bitter GRNs in flies expressing P2X2 in sugar GRNs to PEG, ATP, and bitter,  $\Delta F/F$  traces (E) and maximum  $\Delta F/F$  graph (F),  $n = 6$ . (G, H) GCaMP6s responses of bitter GRNs in flies expressing P2X2 in water GRNs to delivery of PEG, ATP, or bitter to the proboscis,  $\Delta F/F$  traces (G) and maximum  $\Delta F/F$  graph (H),  $n = 9$ . Period of stimulus presentation is indicated by shaded bars, 3 stimulations/fly. Traces of individual flies are shown in grey, the average in black, with the SEM indicated by the grey shaded area. Repeated measures ANOVA with Tukey's multiple comparisons test, \* $p < 0.05$ , \*\* $p < 0.01$ .

**Figure 5 - figure supplement 2**

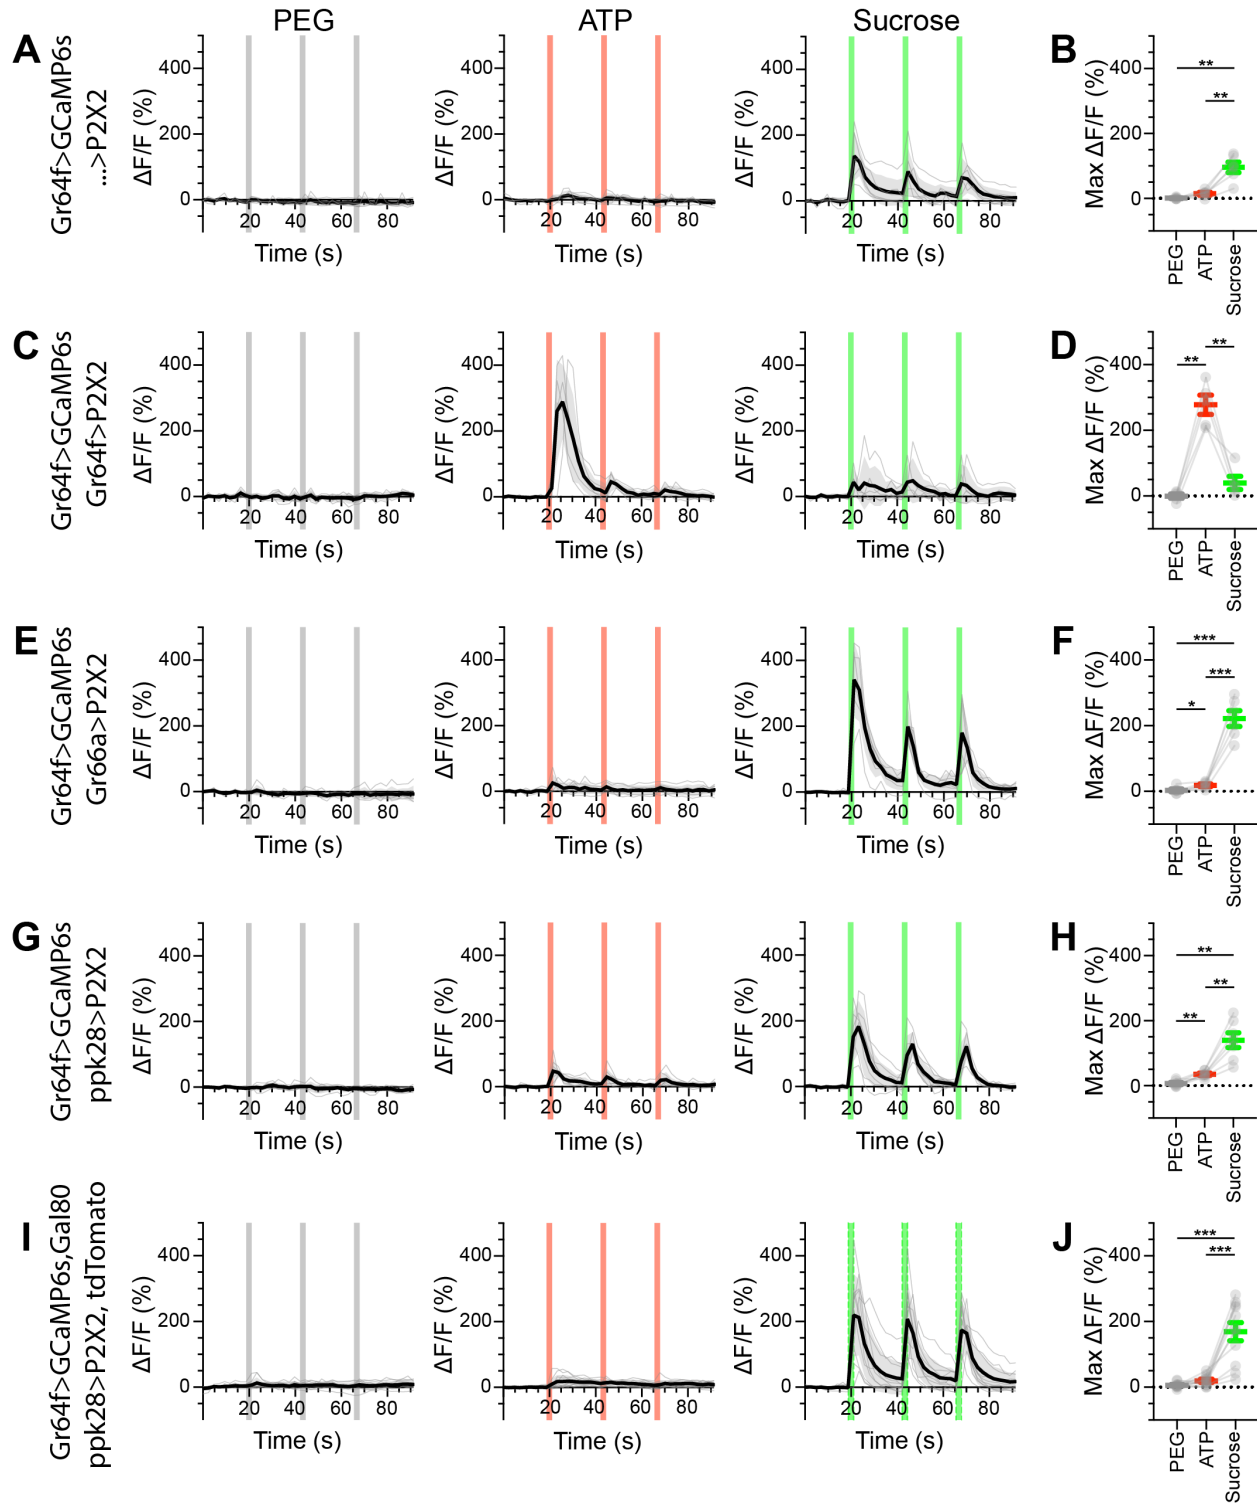

**Figure 5 - figure supplement 2. Sugar GRNs do not respond to the activation of other GRN classes in fed flies.**

(A, B) Calcium responses of sugar GRNs expressing GCaMP6s in a UAS-P2X2 background to proboscis presentation of PEG as a negative control, ATP, or sucrose as a positive control, GCaMP6s  $\Delta F/F$  traces (A) and maximum  $\Delta F/F$  graph (B),  $n = 6$ . (C, D) Calcium responses of sugar GRNs expressing GCaMP6s and P2X2 to PEG, ATP, or sucrose delivery,  $\Delta F/F$  traces (C) and maximum  $\Delta F/F$  graph (D),  $n = 5$ . (E, F) GCaMP6s responses of sugar GRNs in flies expressing P2X2 in bitter GRNs to PEG, ATP, and sucrose,  $\Delta F/F$  traces (E) and maximum  $\Delta F/F$  graph (F),  $n = 6$ . (G, H) GCaMP6s responses of sugar GRNs in flies expressing P2X2 in water GRNs to PEG, ATP, or sucrose presentation,  $\Delta F/F$  traces (G) and maximum  $\Delta F/F$  graph (H),  $n = 7$ . (I, J) GCaMP6s responses of sugar GRNs in flies expressing P2X2 in water GRNs and Gal80 in sugar GRNs to inhibit P2X2 misexpression to PEG, ATP, or sucrose presentation,  $\Delta F/F$  traces (I) and maximum  $\Delta F/F$  plots (J),  $n = 11$ .

Period of stimulus presentation is indicated by shaded bars, 3 stimulations/fly. Data from first stimulation of C and K is shown in Figure 4A-D. Traces of individual flies are shown in grey, the average in black, with the SEM indicated by the grey shaded area. Repeated measures ANOVA with Tukey's multiple comparisons test \* $p < 0.05$ , \*\* $p < 0.01$ , \*\*\* $p < 0.001$ .

Figure 5 - figure supplement 3

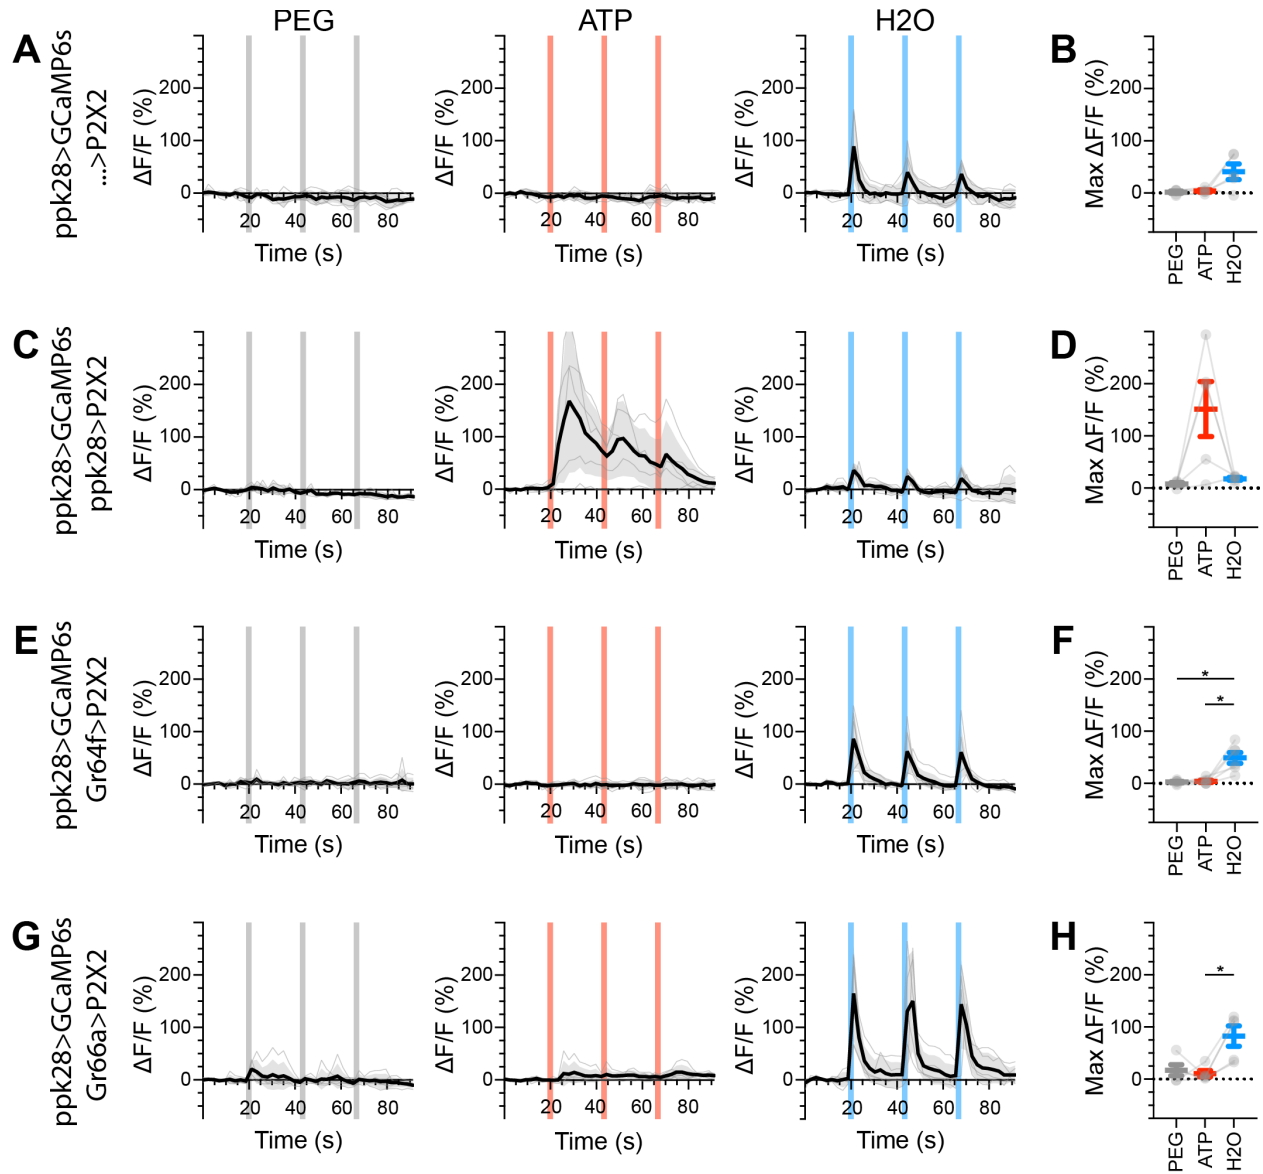

**Figure 5 - figure supplement 3. Water GRNs do not respond to the activation of other GRN classes in fed flies.**

(A, B) Calcium responses of water GRNs expressing GCaMP6s in a UAS-P2X2 background to proboscis presentation of PEG as a negative control, ATP, or water as a positive control, GCaMP6s  $\Delta F/F$  traces (A) and maximum  $\Delta F/F$  graph (B),  $n = 5$ . (C, D) Calcium responses of water GRNs expressing GCaMP6s and P2X2 to PEG, ATP, or water delivery,  $\Delta F/F$  traces (C) and maximum  $\Delta F/F$  graph (D),  $n = 5$ . (E, F) GCaMP6s responses of water GRNs in flies expressing P2X2 in sugar GRNs to PEG, ATP, and water,  $\Delta F/F$  traces (E) and maximum  $\Delta F/F$  graph (F),  $n = 6$ . (G, H) GCaMP6s responses of water GRNs in flies expressing P2X2 in bitter GRNs upon PEG, ATP, or water presentation,  $\Delta F/F$  traces (G) and maximum  $\Delta F/F$  graph (H),  $n = 5$ . Period of stimulus presentation is indicated by shaded bars, 3 stimulations/fly. The first response in C and E is shown in Figure 4G-J. Traces of individual flies are shown in grey, the average in black, with the SEM indicated by the grey shaded area. Repeated measures ANOVA with Tukey's multiple comparisons test  $*p < 0.05$ .



Figure 5 - figure supplement 4

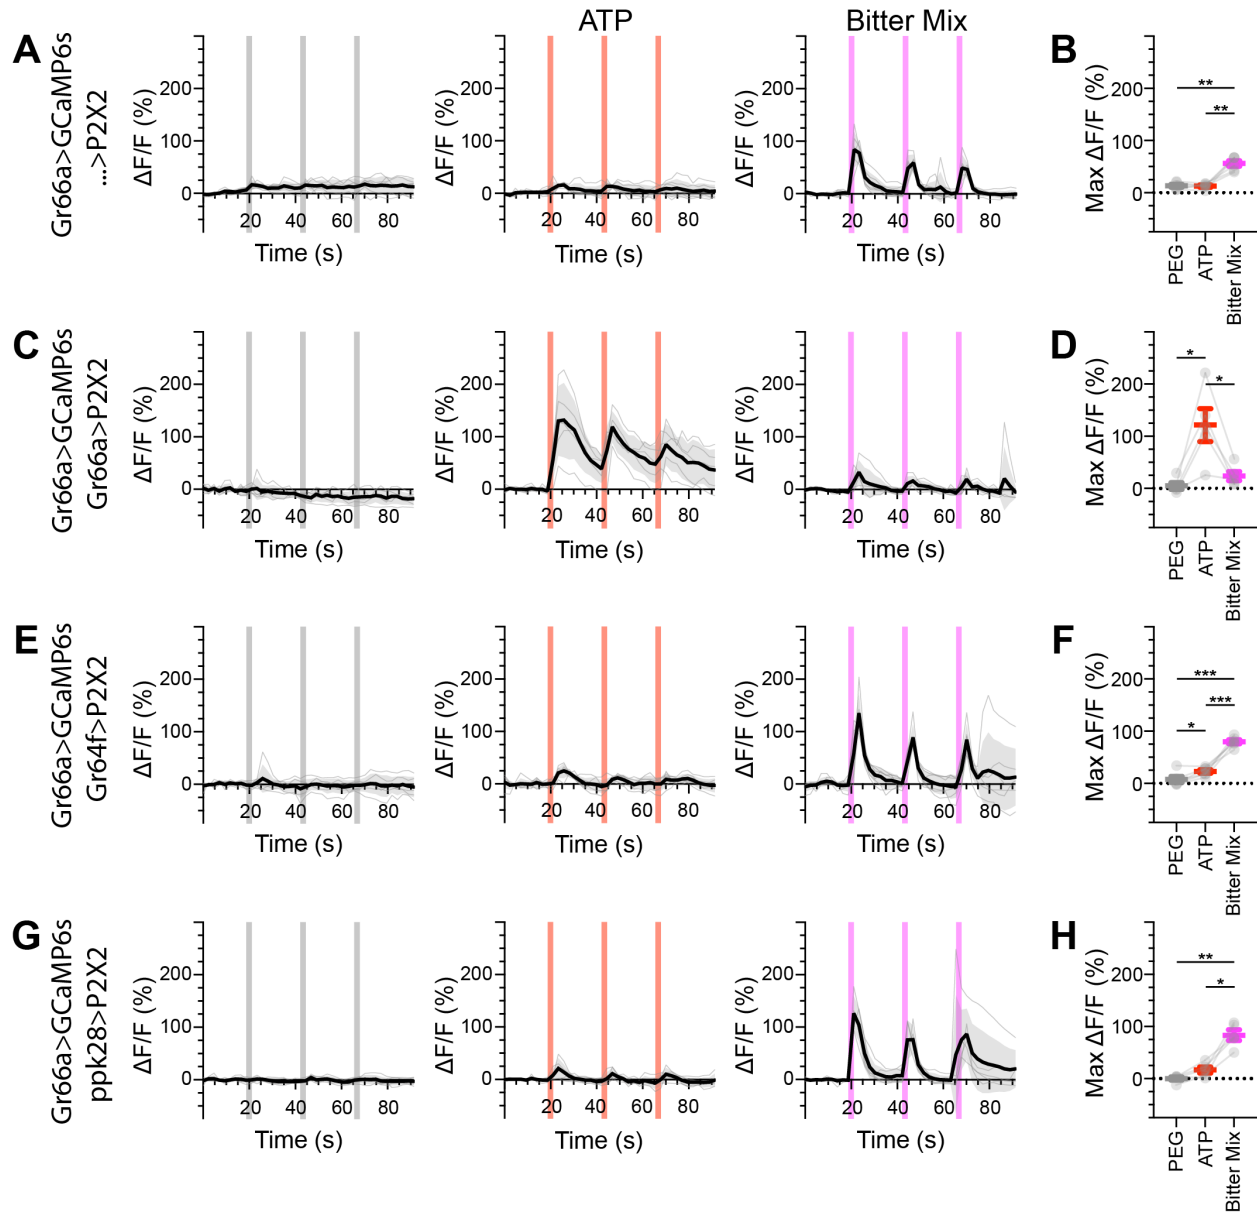

**Figure 5 - figure supplement 4. Bitter GRNs do not respond to the activation of other GRN classes in food-deprived flies.**

(A, B) Calcium responses of bitter GRNs expressing GCaMP6s in a UAS-P2X2 background to proboscis presentation of PEG as a negative control, ATP, or a mixture of the bitter compounds denatonium and caffeine as a positive control, GCaMP6s  $\Delta F/F$  traces (A) and maximum  $\Delta F/F$  graph (B),  $n = 6$ . (C, D) Calcium responses of bitter GRNs expressing GCaMP6s and P2X2 to PEG, ATP, or bitter delivery,  $\Delta F/F$  traces (C) and maximum  $\Delta F/F$  graph (D),  $n = 5$ . (E, F) GCaMP6s responses of bitter GRNs in flies expressing P2X2 in sugar GRNs to PEG, ATP, and bitter,  $\Delta F/F$  traces (E) and maximum  $\Delta F/F$  graph (F),  $n = 6$ . (G, H) GCaMP6s responses of bitter GRNs in flies expressing P2X2 in water GRNs to delivery of PEG, ATP, or bitter,  $\Delta F/F$  traces (G) and maximum  $\Delta F/F$  graph (H),  $n = 5$ .

Period of stimulus presentation is indicated by shaded bars, 3 stimulations/fly. Flies were food-deprived for 23-26 hours. Traces of individual flies are shown in grey, the average in black, with the SEM indicated by the grey shaded area. Repeated measures ANOVA with Tukey's multiple comparisons test, \* $p < 0.05$ , \*\* $p < 0.01$ , \*\*\* $p < 0.001$ .

Figure 5 - figure supplement 5

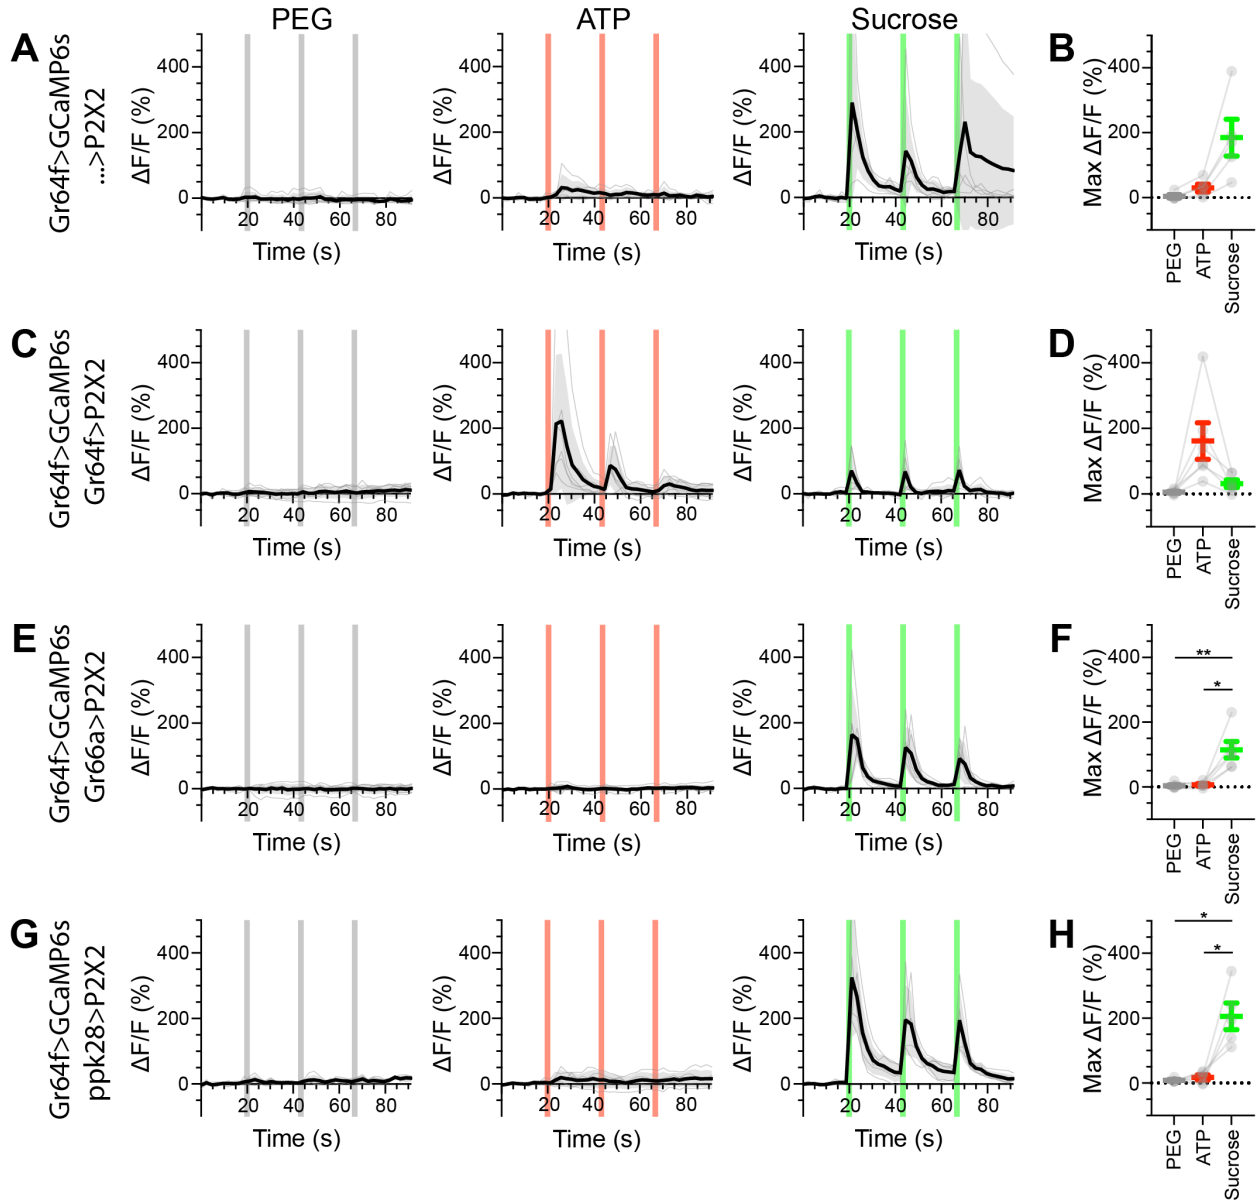

**Figure 5 - figure supplement 5. Sugar GRNs do not respond to the activation of other GRN classes in food-deprived flies.**

(A, B) Calcium responses of sugar GRNs expressing GCaMP6s in a UAS-P2X2 background to proboscis presentation of PEG as a negative control, ATP, or sucrose as a positive control, GCaMP6s  $\Delta F/F$  traces (A) and maximum  $\Delta F/F$  graph (B),  $n = 5$ . (C, D) Calcium responses of sugar GRNs expressing GCaMP6s and P2X2 to PEG, ATP, or sucrose delivery,  $\Delta F/F$  traces (C) and maximum  $\Delta F/F$  graph (D),  $n = 6$ . (E, F) GCaMP6s responses of sugar GRNs in flies expressing P2X2 in bitter GRNs to PEG, ATP, and sucrose,  $\Delta F/F$  traces (E) and maximum  $\Delta F/F$  graph (F),  $n = 6$ . (G, H) GCaMP6s responses of sugar GRNs in flies expressing P2X2 in water GRNs to PEG, ATP, and sucrose presentation to the proboscis,  $\Delta F/F$  traces (G) and maximum  $\Delta F/F$  graph (H),  $n = 5$ .

Period of stimulus presentation is indicated by shaded bars, 3 stimulations/fly. Flies were food-deprived for 23-26 hours. Traces of individual flies are shown in grey, the average in black, with the SEM indicated by the grey shaded area. Repeated measures ANOVA with Tukey's multiple comparisons test \* $p < 0.05$ , \*\* $p < 0.01$ .

Figure 5 - figure supplement 6

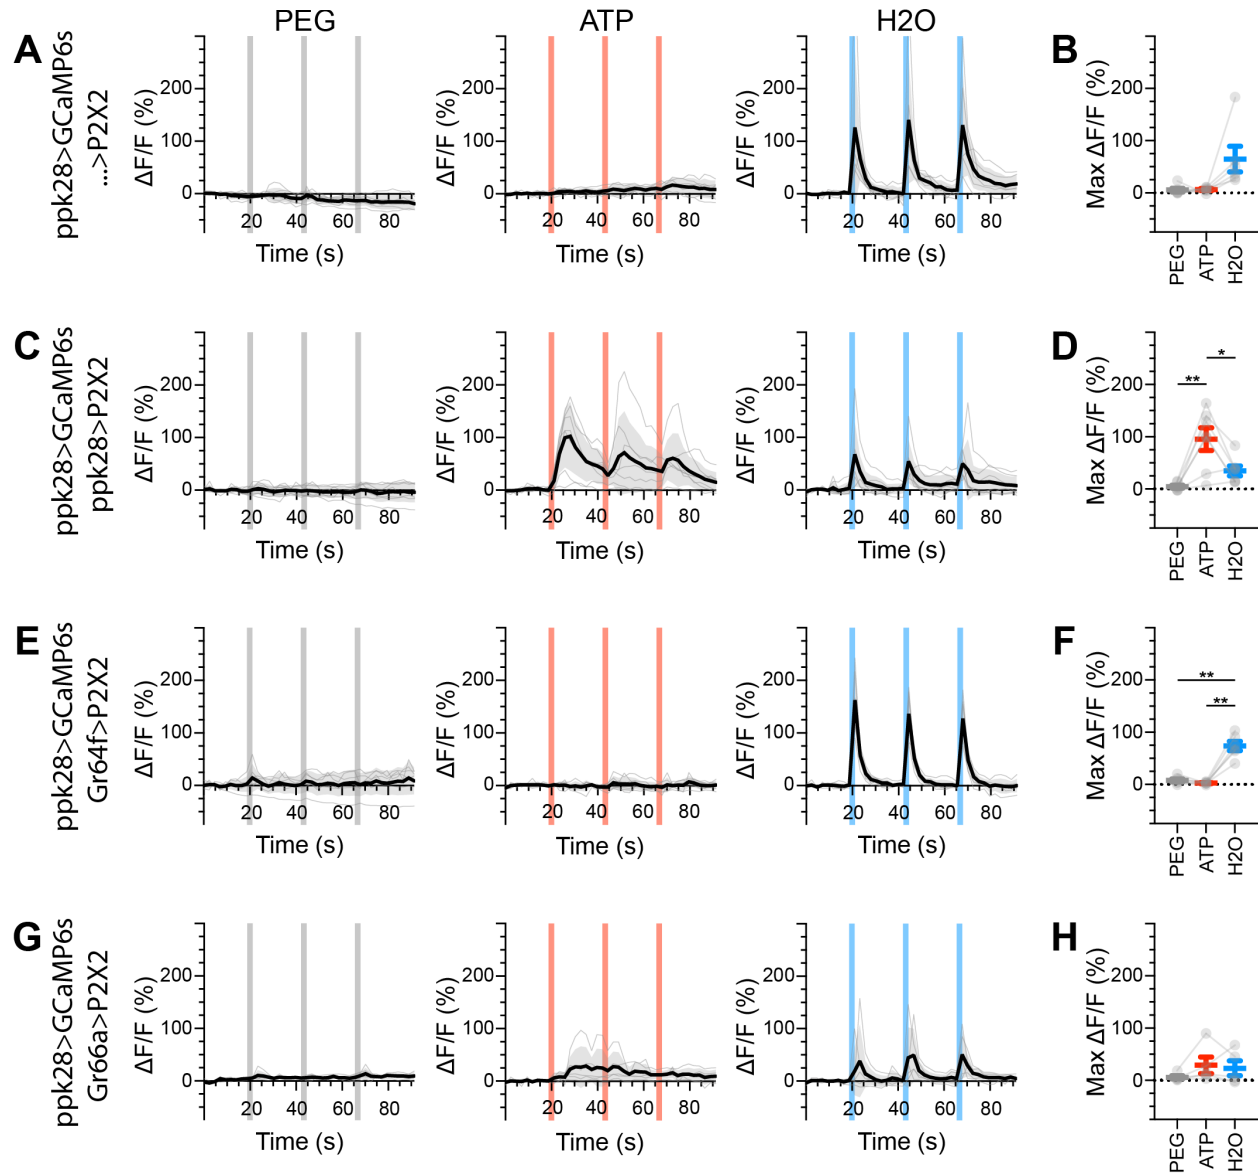

**Figure 5 - figure supplement 6. Water GRNs do not respond to the activation of other GRN classes in food-deprived flies.**

(A, B) Calcium responses of water GRNs expressing GCaMP6s in a UAS-P2X2 background to proboscis presentation of PEG as a negative control, ATP, or water as a positive control, GCaMP6s  $\Delta F/F$  traces (A) and maximum  $\Delta F/F$  graph (B),  $n = 6$ . (C, D) Calcium responses of water GRNs expressing GCaMP6s and P2X2 to PEG, ATP, or water delivery,  $\Delta F/F$  traces (C) and maximum  $\Delta F/F$  graph (D),  $n = 7$ . (E, F) GCaMP6s responses of water GRNs in flies expressing P2X2 in sugar GRNs to PEG, ATP, and water,  $\Delta F/F$  traces (E) and maximum  $\Delta F/F$  graph (F),  $n = 6$ . (G, H) GCaMP6s responses of water GRNs in flies expressing P2X2 in bitter GRNs to PEG, ATP, and water delivery,  $\Delta F/F$  traces (G) and maximum  $\Delta F/F$  graph (H),  $n = 5$ .

Period of stimulus presentation is indicated by shaded bars, 3 stimulations/fly. Flies were food-deprived for 23-26 hours. Traces of individual flies are shown in grey, the average in black, with the SEM indicated by the grey shaded area. Repeated measures ANOVA with Tukey's multiple comparisons test \* $p < 0.05$ , \*\* $p < 0.01$ .

Figure 5 – figure supplement 7

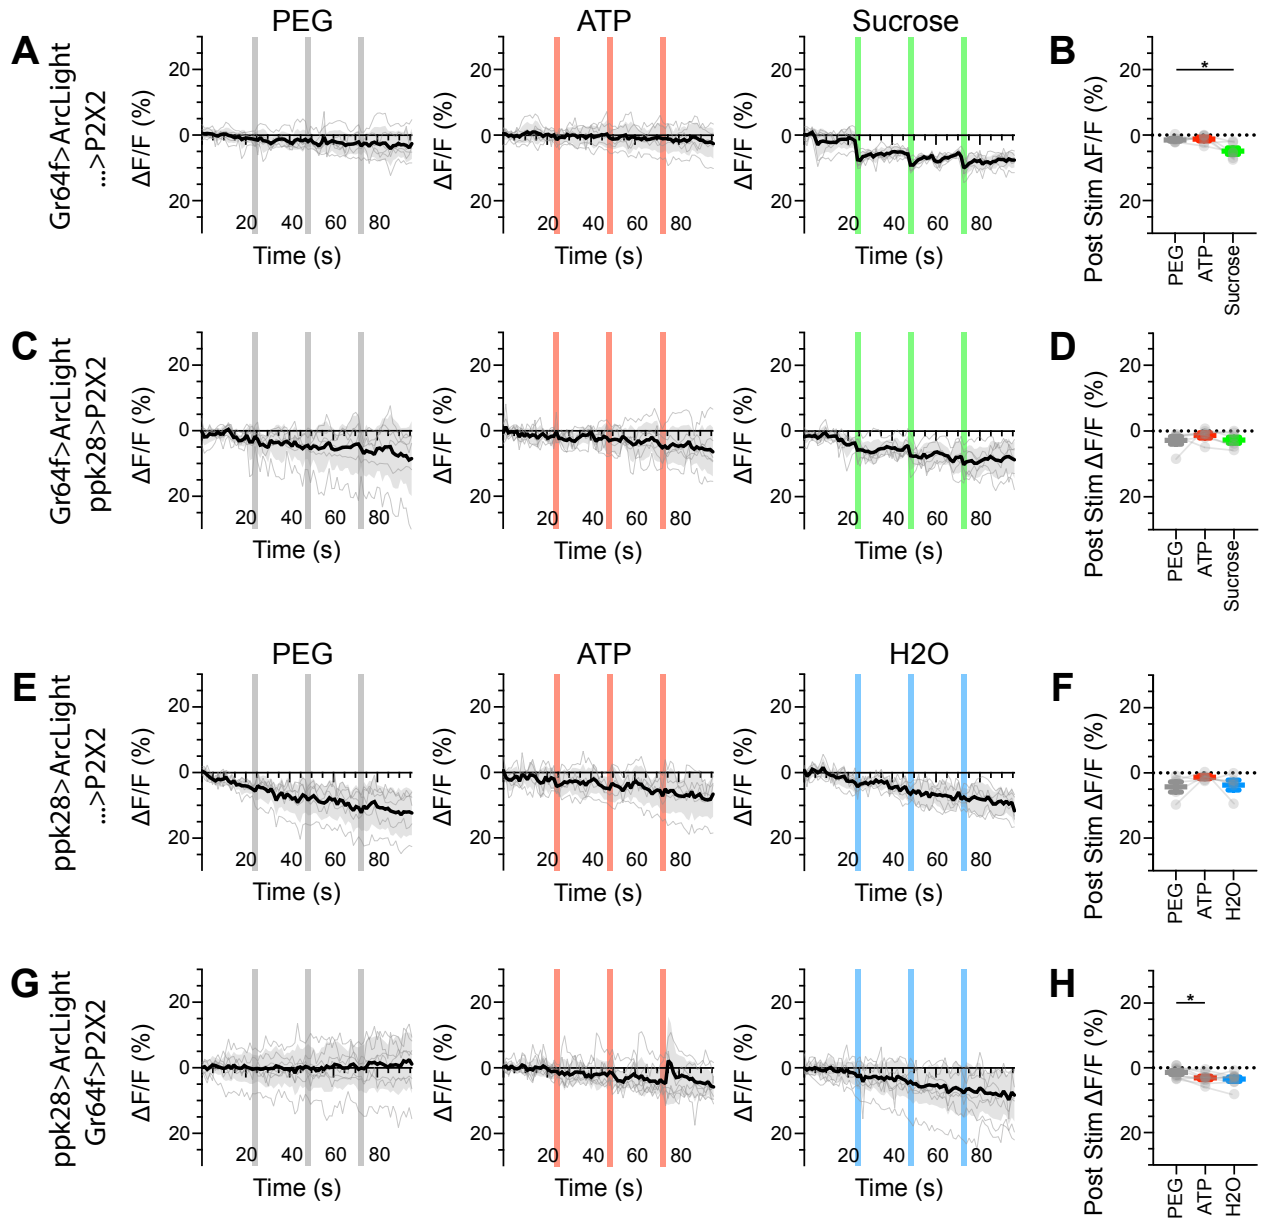



**Figure 5 - figure supplement 7. Sugar and water GRNs do not show voltage responses upon reciprocal activation.**

(A, B) ArcLight responses of sugar GRNs in a UAS-P2X2 background to proboscis presentation of PEG as a negative control, ATP, or sucrose as a positive control. ArcLight fluorescence traces ( $\Delta F/F$ ) (A) and maximum  $\Delta F/F$  post stimulus presentation (B),  $n = 6$ . (C, D) ArcLight responses of sugar GRNs in flies expressing P2X2 in water GRNs to PEG, ATP, and sucrose delivery,  $\Delta F/F$  traces (C) and maximum  $\Delta F/F$  graph (D),  $n = 6$ . (E, F) ArcLight responses of water GRNs in a UAS-P2X2 background to proboscis delivery of PEG, ATP, and water (positive control),  $\Delta F/F$  traces (E) and maximum  $\Delta F/F$  graph (F),  $n = 5$ . (G, H) ArcLight responses of water GRNs in flies expressing P2X2 in sugar GRNs to PEG, ATP, and water delivery,  $\Delta F/F$  traces (G) and maximum  $\Delta F/F$  graph (H),  $n = 9$ .

Period of stimulus presentation is indicated by shaded bars, 3 stimulations/fly. The first response in C and G is shown in Figure 2-4 E, F, K, L. Traces of individual flies to three taste stimulations are shown in grey, the average in black, with the SEM indicated by the grey shaded area. Repeated measures ANOVA with Tukey's multiple comparisons test,  $*p < 0.05$ .

## 460 References

- 461 Bates AS, Manton JD, Jagannathan SR, Costa M, Schlegel P, et al. 2020. The  
462 natverse, a versatile toolbox for combining and analysing neuroanatomical data.  
463 *Elife* 9
- 464 Bates AS, Schlegel P, Roberts RJV, Drummond N, Tamimi IFM, et al. 2020.  
465 Complete Connectomic Reconstruction of Olfactory Projection Neurons in the Fly  
466 Brain. *Curr Biol* 30, 3183-3199
- 467 Bogovic JA, Otsuna H, Heinrich L, Ito M, Jeter J, et al. 2020. An unbiased template of  
468 the *Drosophila* brain and ventral nerve cord. *PLoS One* 15: e0236495
- 469 Braun E, Geurten B, Egelhaaf M. 2010. Identifying prototypical components in  
470 behaviour using clustering algorithms. *PLoS One* 5: e9361
- 471 Buhmann J, Sheridan A, Malin-Mayor C, Schlegel P, Gerhard S, et al. 2021. Automatic  
472 detection of synaptic partners in a whole-brain *Drosophila* electron microscopy  
473 data set. *Nat Methods* 18: 771-74
- 474 Cameron P, Hiroi M, Ngai J, Scott K. 2010. The molecular basis for water taste in  
475 *Drosophila*. *Nature* 465: 91-5
- 476 Cao G, Platasa J, Pieribone VA, Raccuglia D, Kunst M, Nitabach MN. 2013. Genetically  
477 targeted optical electrophysiology in intact neural circuits. *Cell* 154: 904-13
- 478 Chen TW, Wardill TJ, Sun Y, Pulver SR, Renninger SL, et al. 2013. Ultrasensitive  
479 fluorescent proteins for imaging neuronal activity. *Nature* 499: 295-300
- 480 Chen Z, Wang Q, Wang Z. 2010. The amiloride-sensitive epithelial Na<sup>+</sup> channel PPK28  
481 is essential for *drosophila* gustatory water reception. *J Neurosci* 30: 6247-52
- 482 Costa M, Manton JD, Ostrovsky AD, Prohaska S, Jefferis GS. 2016. NBLAST: Rapid,  
483 Sensitive Comparison of Neuronal Structure and Construction of Neuron Family  
484 Databases. *Neuron* 91: 293-311
- 485 Croset V, Schleyer M, Arguello JR, Gerber B, Benton R. 2016. A molecular and  
486 neuronal basis of amino acid sensing in the *Drosophila* larva. *Sci Rep* 6: 34871
- 487 Dahanukar A, Foster K, van der Goes van Naters WM, Carlson JR. 2001. A Gr receptor  
488 is required for response to the sugar trehalose in taste neurons of *Drosophila*.  
489 *Nat Neurosci* 4: 1182-6
- 490 Dahanukar A, Lei YT, Kwon JY, Carlson JR. 2007. Two Gr genes underlie sugar  
491 reception in *Drosophila*. *Neuron* 56: 503-16
- 492 Dweck HKM, Carlson JR. 2020. Molecular Logic and Evolution of Bitter Taste in  
493 *Drosophila*. *Curr Biol* 30:17-30
- 494 Hampel S, Eichler K, Yamada D, Bock DD, Kamikouchi A, Seeds AM. 2020. Distinct  
495 subpopulations of mechanosensory chordotonal organ neurons elicit grooming of  
496 the fruit fly antennae. *Elife* 9
- 497 Harris DT, Kallman BR, Mullaney BC, Scott K. 2015. Representations of Taste Modality  
498 in the *Drosophila* Brain. *Neuron* 86: 1449-60
- 499 Hartenstein V, Omoto JJ, Ngo KT, Wong D, Kuert PA, et al. 2018. Structure and  
500 development of the subesophageal zone of the *Drosophila* brain. I. Segmental  
501 architecture, compartmentalization, and lineage anatomy. *J Comp Neurol* 526: 6-  
502 32
- 503 Horne JA, Langille C, McLin S, Wiederman M, Lu Z, et al. 2018. A resource for the  
504 *Drosophila* antennal lobe provided by the connectome of glomerulus VA1v. *Elife*  
505 7

- 506 Jaeger AH, Stanley M, Weiss ZF, Musso PY, Chan RC, et al. 2018. A complex  
507 peripheral code for salt taste in *Drosophila*. *Elife* 7
- 508 Jefferis GSXE, Manton JD. 2017. NeuroAnatomy  
509 Toolbox. <https://doi.org/10.5281/zenodo.10171>.
- 510 Jefferis GS, Potter CJ, Chan AM, Marin EC, Rohlfsing T, et al. 2007. Comprehensive  
511 maps of *Drosophila* higher olfactory centers: spatially segregated fruit and  
512 pheromone representation. *Cell* 128: 1187-203
- 513 Jourjine N, Mullaney BC, Mann K, Scott K. 2016. Coupled Sensing of Hunger and Thirst  
514 Signals Balances Sugar and Water Consumption. *Cell* 166: 855-66
- 515 Klapoetke NC, Murata Y, Kim SS, Pulver SR, Birdsey-Benson A, et al. 2014.  
516 Independent optical excitation of distinct neural populations. *Nat Methods*  
517 11:338-46
- 518 Kwon JY, Dahanukar A, Weiss LA, Carlson JR. 2011. Molecular and cellular  
519 organization of the taste system in the *Drosophila* larva. *J Neurosci* 31: 15300-9
- 520 Li F, Lindsey JW, Marin EC, Otto N, Dreher M, et al. 2020a. The connectome of the  
521 adult *Drosophila* mushroom body provides insights into function. *Elife* 9
- 522 Li PH, Lindsey LF, Januszewski M, Tyka M, Maitin-Shepard J, et al. 2019. Automated  
523 Reconstruction of a Serial-Section EM *Drosophila* Brain with Flood-Filling  
524 Networks and Local Realignment. *Microscopy and Microanalysis* 25: 1364-65
- 525 Lima SQ, Miesenbock G. 2005. Remote control of behavior through genetically targeted  
526 photostimulation of neurons. *Cell* 121: 141-52
- 527 Meinertzhagen IA. 2018. Of what use is connectomics? A personal perspective on  
528 the *Drosophila* connectome. *J Exp Biol* 221: jeb164954
- 529 Miroshnikow A, Schlegel P, Schoofs A, Hueckesfeld S, Li F, et al. 2018. Convergence  
530 of monosynaptic and polysynaptic sensory paths onto common motor outputs in  
531 a *Drosophila* feeding connectome. *Elife* 7
- 532 Miyamoto T, Slone J, Song X, Amrein H. 2012. A fructose receptor functions as a  
533 nutrient sensor in the *Drosophila* brain. *Cell* 151: 1113-25
- 534 Miyazaki T, Ito K. 2010. Neural architecture of the primary gustatory center of  
535 *Drosophila melanogaster* visualized with GAL4 and LexA enhancer-trap systems.  
536 *J Comp Neurol* 518: 4147-81
- 537 Nayak S, Singh R. 1983. Sensilla on the tarsal segments and mouthparts of adult  
538 *Drosophila melanogaster* meigen *Int J Insect Morphol & Embryol* 12: 273-91
- 539 Olsen SR and Wilson RI. 2008. Lateral presynaptic inhibition mediates gain control in  
540 an olfactory circuit. *Nature* 452, 956-960
- 541 Otsana H, Ito M, Kawase T. 2018. Color depth MIP mask search: a new tool to expedite  
542 Split-GAL4 creation. *bioRxiv*. <https://doi.org/10.1101/318006>
- 543 Rajashekhar KP, Singh R. 1994. Neuroarchitecture of the Tritocerebrum of *Drosophila*  
544 *melanogaster*. *J Comp Neurol* 349: 633-45
- 545 Robinson IM, Ranjan R, Schwarz TL. 2002. Synaptotagmins I and IV promote  
546 transmitter release independently of Ca(2+) binding in the C(2)A domain. *Nature*  
547 418:336-40
- 548 Rohlfsing T and Maurer CR Jr. 2003. Nonrigid image registration in shared-memory  
549 multiprocessor environments with application to brains, breasts, and bees. *IEEE*  
550 *Trans Inf Technol Biomed* 7:16-25

- 551 Saalfeld S, Cardona A, Hartenstein V, Tomancak P. 2009. CATMAID: collaborative  
552 annotation toolkit for massive amounts of image data. *Bioinformatics* 25: 1984-6  
553 Schindelin J, Arganda-Carreras I, Frise E, Kaynig V, Longair M, et al. 2012. Fiji: an  
554 open-source platform for biological-image analysis. *Nat Methods* 9: 676-82  
555 Schlegel P, Bates AS, Sturmer T, Jagannathan SR, Drummond N, et al. 2021.  
556 Information flow, cell types and stereotypy in a full olfactory connectome. *Elife* 10  
557 Schneider-Mizell CM, Gerhard S, Longair M, Kazimiers T, Li F, et al. 2016. Quantitative  
558 neuroanatomy for connectomics in *Drosophila*. *Elife* 5  
559 Scott K, Brady R, Cravchik A, Morozov P, Rzhetsky A, et al. 2001. A Chemosensory  
560 Gene Family Encoding Candidate Gustatory and Olfactory Receptors in  
561 *Drosophila* *Cell* 104: 661-73  
562 Shannon P, Markiel A, Ozier O, Baliga NS, Wang JT, et al. 2003. Cytoscape: a software  
563 environment for integrated models of biomolecular interaction networks. *Genome*  
564 *Res* 13: 2498-504  
565 Sterne GR, Otsuna H, Dickson BJ, Scott K. 2021. Classification and genetic targeting of  
566 cell types in the primary taste and premotor center of the adult *Drosophila* brain.  
567 *Elife* 10  
568 Stocker RF. 1994. The Organization of the Chemosensory System in *Drosophila*  
569 *melanogaster*: a Review *Cell Tissue Res* 275: 3-26  
570 Takemura SY, Aso Y, Hige T, Wong A, Lu Z, et al. 2017. A connectome of a learning  
571 and memory center in the adult *Drosophila* brain. *Elife* 6  
572 Takemura SY, Bharioke A, Lu Z, Nern A, Vitaladevuni S, et al. 2013. A visual motion  
573 detection circuit suggested by *Drosophila* connectomics. *Nature* 500: 175-81  
574 Takemura SY, Xu CS, Lu Z, Rivlin PK, Parag T, et al. 2015. Synaptic circuits and their  
575 variations within different columns in the visual system of *Drosophila*. *Proc Natl*  
576 *Acad Sci U S A* 112: 13711-6  
577 Thistle R, Cameron P, Ghorayshi A, Dennison L, Scott K. 2012. Contact  
578 chemoreceptors mediate male-male repulsion and male-female attraction during  
579 *Drosophila* courtship. *Cell* 149: 1140-51  
580 Thorne N, Chromey C, Bray S, Amrein H. 2004. Taste perception and coding in  
581 *Drosophila*. *Curr Biol* 14: 1065-79  
582 Tobin WF, Wilson RI, Lee WA. 2017. Wiring variations that enable and constrain neural  
583 computation in a sensory microcircuit. *Elife* 6  
584 Wang JW, Wong AM, Flores J, Vosshall LB, Axel R. 2003. Two-Photon Calcium  
585 Imaging Reveals an Odor-Evoked Map of Activity in the Fly Brain. *Cell* 112: 271-  
586 82  
587 Wang Z, Singhvi A, Kong P, Scott K. 2004. Taste representations in the *Drosophila*  
588 brain. *Cell* 117: 981-91  
589 Weiss LA, Dahanukar A, Kwon JY, Banerjee D, Carlson JR. 2011. The molecular and  
590 cellular basis of bitter taste in *Drosophila*. *Neuron* 69: 258-72  
591 Yao Z, Macara AM, Lelito KR, Minosyan TY, Shafer OT. 2012. Analysis of functional  
592 neuronal connectivity in the *Drosophila* brain. *J Neurophysiol* 108: 684-96  
593 Yarmolinsky DA, Zuker CS, Ryba NJP. 2009. Common sense about taste: from  
594 mammals to insects. *Cell* 139: 234-44

595 Zheng Z, Lauritzen JS, Perlman E, Robinson CG, Nichols M, et al. 2018. A Complete  
596 Electron Microscopy Volume of the Brain of Adult *Drosophila melanogaster*. *Cell*  
597 174: 730-43 e22
